**The gene *brain tumor* constrains growth to ensure proper patterning during regeneration in *Drosophila* imaginal discs**

***Short title: brain tumor* and regenerative growth and patterning**

**Syeda Nayab Fatima Abidi<sup>1</sup> and Rachel K. Smith-Bolton<sup>1,\*</sup>**

<sup>1</sup> Department of Cell and Developmental Biology, University of Illinois Urbana-Champaign, Urbana, IL 61801, USA

\* [rsbolton@illinois.edu](mailto:rsbolton@illinois.edu)

## 1 **Abstract**

2

3 Regeneration after injury happens in a complex environment that requires precise  
4 orchestration of cell proliferation and establishment of correct patterning and cell-fate  
5 specification to ensure a fully functional outcome. Regenerative growth needs to be  
6 controlled and constrained to prevent overgrowth and to allow differentiation. However,  
7 the factors that are required to restrict regeneration to facilitate patterning of the  
8 regenerating tissue and establishment of correct cell fates have not been identified.  
9 Using a genetic ablation system in the *Drosophila* wing imaginal disc, we have identified  
10 the gene *brain tumor (brat)* as a protective factor that shields the regenerating tissue  
11 from excessive pro-growth gene activation and enables correct patterning and cell-fate  
12 specification. Regenerating discs with reduced levels of *brat* are unable to pattern  
13 correctly resulting in adult wings with a disrupted wing margin. This mis-patterning is  
14 due to elevated levels of the pro-growth factor Myc and the self-renewal factor Chinmo,  
15 which lead to suppression of the cell fate-specification gene *cut (ct)*. Thus, Brat protects  
16 regenerating tissue from erroneous patterning by constraining expression of pro-  
17 regeneration genes.

18

## 19 **Introduction**

20 Regeneration is the remarkable process by which some organisms replace tissues and  
21 organs after damage such that both morphology and function are restored. Complete  
22 regeneration requires several steps to occur correctly including wound healing, cell

23 proliferation, and proper patterning and cell-fate specification in the newly formed tissue.  
24 The degree of regenerative capacity varies among different species, ranging from  
25 whole-body regeneration in hydra and planaria to limited tissue regeneration in  
26 mammals. Work in several model organisms has identified signaling pathways and  
27 molecular mechanisms that are important for initiating and executing regenerative  
28 growth after tissue damage, including JNK signaling (1–5), JAK/STAT signaling (6–8),  
29 EGFR signaling (9–12), Hippo signaling (13–17), Wnt signaling (18–24), and Myc  
30 (23,25). Many of these mechanisms are also important during normal development, and  
31 the process of regeneration was traditionally thought to be a redeployment of earlier  
32 developmental steps (9,26–29). However, recent evidence suggests that regeneration is  
33 not a simple reiteration of development but can employ regeneration-specific regulatory  
34 mechanisms (3,25,30–34). Indeed, faithful regeneration likely requires additional  
35 mechanisms, since regrowth happens in the presence of wound-response signaling and  
36 in a developed juvenile or adult organism. Additionally, pro-growth pathways that are  
37 used during normal development are often activated in new ways and at higher  
38 strengths in the regenerating tissue (2,7,15,23). These augmented pro-growth signals  
39 must decline as regeneration progresses to prevent unrestrained growth and to enable  
40 re-establishment of pattern and cell-fate specification. Thus, regeneration-specific  
41 growth suppressors and additional patterning factors are likely used to terminate  
42 regeneration and allow differentiation (reviewed in 35). However, despite our  
43 understanding of the pro-growth signals needed for regeneration, we do not yet know  
44 what distinct regeneration-specific factors exist in different model organisms to restrain  
45 growth and promote re-patterning of regenerating tissue.

46

47 *Drosophila melanogaster* imaginal discs, precursors of adult fly appendages, are simple  
48 columnar epithelia that have well-characterized, complex expression of patterning  
49 genes that determine cell-fate specification. Imaginal discs undergo regeneration after  
50 damage (reviewed in 36), and we have previously used a genetic ablation system to  
51 study patterning in the regenerating tissue (23,32). Here we identify *brain tumor (brat)*  
52 as a critical growth regulator and patterning factor necessary for the establishment of  
53 proper cell fates during regeneration in *Drosophila* imaginal discs. Brat is a member of  
54 the TRIM- (tripartite motif containing)-NHL (NCL-1, HT2A, and LIN-41) family of proteins  
55 and functions as a translational repressor by binding to its target RNAs either  
56 independently or in a complex with Pumilio and Nanos (37–39). It acts as a potent  
57 differentiation factor and tumor suppressor in neural and ovarian germline stem cell  
58 lineages (40–43). Human and mouse orthologs of Brat, TRIM3 and TRIM32  
59 respectively, also possess tumor-suppressor activity in glioblastomas and are required  
60 for neuronal differentiation (44,45). Furthermore, TRIM32 regulates muscle stem cell  
61 differentiation, which impacts muscular growth during development and regeneration  
62 (46,47). However, to our knowledge, TRIM-NHL family members have not been  
63 reported to have a function in regeneration that does not employ stem cells.

64

65 We show that regenerating wing imaginal discs with reduced levels of Brat regenerate  
66 better than controls, but the resulting adult wings have a disrupted margin. The margin  
67 loses some of the characteristic sensory bristles and veins, demonstrating an error in

68 cell-fate specification. Importantly, these phenotypes are regeneration-specific, as they  
69 are not observed in the mutant animals after normal development. The enhanced  
70 regeneration is due to increased expression of the growth regulators Myc and Wingless  
71 as well as upregulation of *ilp8*, which delays metamorphosis and allows the damaged  
72 tissue more time to regenerate. Intriguingly, the aberrant cell-fate specification is caused  
73 by elevated Myc expression, which is required for regenerative growth (23) but  
74 negatively regulates margin cell fates, likely through misregulation of the transcription  
75 factor Chronologically inappropriate morphogenesis (Chinmo), which inhibits  
76 differentiation. Hence, Brat acts as an important growth regulator and protective factor  
77 by constraining Myc and Chinmo levels during regeneration to prevent errors in  
78 patterning, cell-fate specification, and differentiation in the regenerating tissue. Because  
79 Brat's role in regeneration is reminiscent of its function in stem cell differentiation, we  
80 propose a general role for Brat as a key differentiation factor in different biological  
81 contexts.

82

## 83 **Results**

### 84 **Brat suppresses regenerative growth and is required for wing margin cell-fate** 85 **specification during regeneration**

86 To identify genes important for regenerative growth and re-patterning, we performed a  
87 candidate screen, using our wing imaginal disc ablation system (23). The primordial  
88 wing was targeted for ablation at the early third-instar larval stage by using *rotund-GAL4*  
89 to drive the expression of the proapoptotic gene *reaper* for 24 hours (Fig 1A). Our ability

90 to restrict damage to 24 hours was provided by *tubulin-GAL80<sup>ts</sup>*, which can inhibit GAL4  
91 activity at 18°C, but allows GAL4-driven cell death at 30°C in the 24-hour window. The  
92 extent of wing imaginal disc regeneration in the larvae was reflected in the adult wing  
93 size. Hence, the resulting adult wings were scored based on size and patterning  
94 features to identify mutants that affect genes that are involved in regulating regenerative  
95 growth and establishment of cell fates. There is inherent variability in this system  
96 because of its sensitivity to environmental conditions such as temperature, humidity,  
97 and food quality, causing the results of different experiments to vary slightly (14,48–51).  
98 Animals with the same genotype within an experiment also showed some variation, due  
99 to stochastic differences in the time each animal takes to eclose, with animals that take  
100 longer to eclose having larger wings (23,50). However, differences between control and  
101 mutant animals using this system are reproducible, consistent, and have identified key  
102 regeneration genes (32,49–51).

103

104 Using this genetic ablation system, we identified the gene *brain tumor (brat)* as an  
105 important regulator of regenerative growth. *brat<sup>1</sup>/+* mutants that did not experience  
106 damage during development had adult wings that were not significantly different in size  
107 from controls (Fig S1A). However, after ablation and regeneration were induced, *brat<sup>1</sup>/+*  
108 mutants showed enhanced regeneration and had adult wings that were, on average,  
109 much larger than controls that had also undergone regeneration (Fig 1B and 1C). We  
110 confirmed this enhanced regeneration phenotype in heterozygotes for three other *brat*  
111 mutant alleles: *brat<sup>192</sup>*, *brat<sup>150</sup>* (52) and *brat<sup>11</sup>* (53), as well as two deficiencies that  
112 remove the *brat* locus: *Df(2L)Exel8040* (54) and *Df(2L)TE37-7* (55) (Fig S1B and S1C).

113 The phenotype was weaker in the deficiencies, which affected multiple other genes in  
114 addition to the *brat* locus, the reduction of which may ameliorate the *brat* mutant  
115 phenotype.

116

117 Interestingly, we also discovered a role for *brat* in cell-fate specification during  
118 regeneration. After normal development, *brat*<sup>1/+</sup> mutants had adult wings that were  
119 patterned normally (Fig 1D, 1E and Fig S1D). To confirm that loss of *brat* does not  
120 cause patterning errors during normal development, we knocked down Brat levels in the  
121 entire wing pouch using *brat* RNAi, which resulted in adult wings that were patterned  
122 normally (Fig S1E and S1F). A previous study in which Brat levels were reduced in the  
123 anterior and posterior compartments of the wing also did not report any patterning  
124 defects (56). However, when discs were ablated and allowed to regenerate, *brat*  
125 heterozygous mutant wings showed aberrant patterning such that the wing margin lost  
126 sensory bristles and vein material (Fig 1F and 1G). By contrast, control regenerated  
127 wings lost margin tissue at a lower frequency (Fig 1H and 1I). Furthermore, the extent of  
128 margin tissue lost was not as severe in control regenerated wings as compared to  
129 *brat*<sup>1/+</sup> regenerated wings (Fig 1H and 1I). Similar to the enhanced regeneration seen in  
130 *brat* mutants, we confirmed the loss-of-margin defect in heterozygotes for the additional  
131 three mutant alleles and two deficiencies (Fig S1G and S1H). The deficiencies again  
132 showed a weaker phenotype.

133

134 Brat often forms a complex with Pumilio to suppress its target mRNAs (37–39).  
135 However, we found that mutations in *pumilio* were unable to recapitulate the *brat*  
136 phenotype (Fig S1I). These data suggest a requirement for *brat*, independent of *pumilio*,  
137 in suppressing growth during regeneration and establishing correct cell fates at the wing  
138 margin.

139

#### 140 ***brat* regulates entry into metamorphosis**

141 Tissue damage in imaginal discs can induce a systemic response in the larvae, which  
142 extends the larval phase of development and delays pupariation (23,57). This delay in  
143 pupariation is due to expression of the relaxin-like peptide *ilp8* in damaged discs  
144 (58,59). To determine whether *brat* mutants regenerated better due to an enhanced  
145 delay in pupariation, we measured rates of pupariation in control and mutant animals.  
146 We found that during normal development, control and *brat*<sup>1/+</sup> animals pupariated at the  
147 same time, indicating that the two genotypes develop at similar rates (Fig S2A). After  
148 disc damage, *brat* mutants delayed pupariation an additional day compared to controls  
149 in which discs were also damaged (Fig 2A and Fig S2B). The deficiencies also showed  
150 an enhanced delay, but it was not as pronounced as the delay experienced by the  
151 mutant alleles (Fig S2C), likely due to the deficiencies affecting multiple genes. Note  
152 that direct comparisons cannot be made between regenerating larvae that spent 24  
153 hours at 30°C (Fig 2A, S2B and S2C) and normally developing larvae that remain at  
154 18°C (Fig S2A), due to the effects of temperature on development. Our data show that  
155 *brat*<sup>1/+</sup> mutants are able to stay in the larval stage even longer than controls, giving them



156 more time to regenerate. The shorter delay in pupariation experienced by the  
157 deficiencies may account for their slightly decreased regenerative potential compared to  
158 *brat<sup>1/+</sup>* animals (Fig S1C).

159

160 To determine why discs with reduced Brat had an increased delay in pupariation, we  
161 measured *ilp8* transcript levels through qPCR. Undamaged control animals express  
162 very low *ilp8* levels. However, after regeneration was induced, we saw an 80-fold  
163 increase in *ilp8* levels in controls, while the *brat<sup>1/+</sup>* animals showed a 140-fold increase  
164 (Fig 2B). Thus, *brat* suppresses *ilp8* during regeneration, regulating the timing of  
165 pupariation.

166

### 167 ***brat* restricts growth and proliferation during regeneration**

168 Regenerative growth occurs through localized cell proliferation at the wound site  
169 (23,60). The proliferating cells, known as the blastema, give rise to the regenerated  
170 tissue. The blastema and the subsequent regenerated wing pouch can be labeled with  
171 the wing primordium marker Nubbin (Nub) (61). To determine whether *brat<sup>1/+</sup>* discs  
172 regenerated better due to increased growth rates in the wing pouch, we measured the  
173 area of the Nub-expressing cells in control and *brat<sup>1/+</sup>* regenerating discs. In the initial  
174 stages of regeneration, the control and mutant had similar Nub-expressing areas,  
175 indicating equal ablation and equal early regrowth. However, by 48 hours after tissue  
176 damage (recovery time 48, or R48), *brat<sup>1/+</sup>* wing discs had a significantly bigger Nub-  
177 expressing pouch than the control (Fig 2D, 2E and 2F), indicating that *brat/+* mutants

178 were regenerating faster than controls. To assess whether this difference in growth  
179 rates was due to differences in proliferation, we counted cells going through mitosis by  
180 quantifying Phospho-histone H3 (PH3)-positive nuclei in the regenerating blastema.  
181 Reduction of *brat* resulted in a significantly higher number of PH3-positive nuclei per  
182 area at R0, but this increased proliferation had subsided to normal levels by R24 (Fig  
183 2G, 2H and 2I). Differences in proliferation early in regeneration often become evident  
184 later when measuring wing pouch area (51). Therefore, reduction of *brat* gives the  
185 regenerating tissue a growth advantage early in regeneration, resulting in a measurable  
186 difference in tissue area by R48.

187

188 Wingless (*Wg*) and *Myc* are regulators of regenerative growth and are upregulated at  
189 the wound site after damage (20,21,23). Interestingly, *Brat* regulates stem cell  
190 differentiation in the brain by suppressing self-renewal factors such as Wnt signaling  
191 and *Myc* to enable specification of progenitor cell fate (42,62). Additionally, *Brat*  
192 overexpression can suppress *Myc* levels in wing disc epithelial cells, although loss of  
193 *brat* does not lead to elevated *Myc* levels in wing discs during normal development (56).  
194 To determine whether these regulators of regenerative growth are upregulated in *brat*<sup>1/+</sup>  
195 regenerating discs, we examined the expression of *Wg* and *Myc*. *Wg* is normally  
196 expressed along the Dorso-ventral (DV) boundary and in two concentric circles at the  
197 inner and outer edge of the wing pouch (63, Fig 3A), and *Myc* is expressed in the wing  
198 pouch, but is repressed in the cells at the DV boundary as they undergo cell cycle and  
199 growth arrest (64, Fig 3B). Both *Wg* and *Myc* expression were comparable to controls in  
200 undamaged *brat*<sup>1/+</sup> discs (Fig S3A, S3B, S3C, S3D and S3E). When damage is

201 induced, Wg is upregulated throughout the blastema by R0 (23, Fig 3C). Reduction of  
202 *brat* expression resulted in significantly higher levels of Wg expression at R0 (Fig 3D  
203 and 3E) but not at R24 (Fig 3F). After ablation, Myc expression is elevated in the  
204 regenerating tissue (23, Fig 3G and 3H). *brat*<sup>1/+</sup> discs showed significantly higher levels  
205 of Myc at R0, which were sustained through R24 (Fig 3I, 3J and 3K). Thus, loss of *brat*  
206 caused an increase in the levels of both Wg and Myc early in regeneration. The  
207 elevated expression of these growth regulators likely explains the high proliferation seen  
208 in *brat*<sup>1/+</sup> discs at R0, and the larger wing pouch at R48.

209

### 210 ***brat* is required for margin cell-fate specification during regeneration**

211 Reduction of *brat* during regeneration caused patterning defects specifically at the wing  
212 margin, resulting in the loss of vein at the margin and loss of sensory bristles (Fig 1G).  
213 Thus, *brat* is required for correct cell-fate specification at the DV boundary during  
214 regeneration. The wing imaginal disc is divided into the dorsal and the ventral  
215 compartments, with expression of the LIM-homeodomain protein Apterous (Ap) in  
216 dorsal cells. The juxtaposition of the dorsal and ventral cells forms the DV boundary,  
217 which develops into the adult wing margin (65, Fig 4A). Notch (N) and Wg signaling at  
218 the DV boundary are crucial for the correct organization and cell-fate specification at the  
219 boundary (66). *cut* (*ct*) and *achaete* (*ac*) are margin-specific genes that are expressed  
220 downstream of N and Wg signaling. *ct* is required for the specification of the wing  
221 margin, and *ac* specifies the pro-neural sensory organ precursors (66,67, Fig 4A).

222

223 To investigate whether the errors in fate specification seen in *brat*<sup>1/+</sup> discs were due to  
224 a compromised compartment boundary, we examined the expression of Ap using the  
225 *ap-lacZ* reporter. *ap-lacZ* expression showed a clear DV boundary in the undamaged  
226 control discs (Fig 4B). The DV boundary remained intact after ablation in control and  
227 *brat*<sup>1/+</sup> discs (Fig 4C, 4D, Fig S4A and S4B). *ap-lacZ* expression was also seen in the  
228 debris found in the damaged wing imaginal disc, due to the perdurance of  $\beta$ -gal.  
229 Furthermore, Wg expression was restored to its normal DV expression by R48 in both  
230 control and *brat*<sup>1/+</sup> discs (Fig S4C and S4D). Therefore, the patterning defects were not  
231 caused by disruptions in the DV boundary or changes in Wg expression.

232

233 Next, we examined N signaling in *brat*<sup>1/+</sup> discs due to its critical role in specifying fates  
234 at the DV boundary. We used a N signaling reporter, which uses *Notch Response*  
235 *Elements* (NREs) that bind to the Notch co-receptor Suppressor of Hairless, to drive the  
236 expression of GFP (68). No difference was detected in the expression of the N reporter  
237 for undamaged control and *brat*<sup>1/+</sup> discs (Fig 4E and 4F). N signaling at the DV  
238 boundary was restored by R24 in controls and continued at R48 (Fig 4G and 4H). Note  
239 that the reporter signal can also be seen in cellular debris in the regenerating discs due  
240 to the perdurance of GFP. Interestingly, *brat*<sup>1/+</sup> discs showed highly elevated levels of  
241 the N signaling reporter at both these time points (Fig 4I and 4J). This result is  
242 consistent with recent evidence demonstrating Brat's ability to attenuate N nuclear  
243 transport in the brain (69).

244

## 245 **Brat does not regulate margin cell-fate specification through Notch signaling**

246 While loss of the wing margin is normally associated with reduced N signaling, we  
247 wondered whether this elevated N signaling could also disrupt margin fates. Indeed, a  
248 screen for N regulators found that up-regulation of N signaling in the wing disc could  
249 also result in notches (68). However, we have shown that in regenerating discs,  
250 elevated N signaling cannot replicate the *brat*<sup>1/+</sup> phenotype, and reducing N signaling in  
251 the *brat*<sup>1/+</sup> mutant does not rescue the patterning defect. To test whether increasing N  
252 signaling could phenocopy the *brat* mutation, we overexpressed the N-intracellular  
253 domain in the wing pouch during the 24-hour ablation period (Fig S4E and S4F).  
254 Regenerating discs that experienced increased N activity in the wing pouch resulted in  
255 adult wings that were patterned remarkably well, with significantly fewer wings showing  
256 any margin defects when compared to the control (Fig S4G). Thus, increased N activity  
257 during regeneration suppresses margin defects.

258

259 To assess whether decreasing N activity in *brat*<sup>1/+</sup> regenerating discs could rescue the  
260 margin defect phenotype. We used a mutation in the *anterior pharynx defective 1 (aph-*  
261 *1)* gene to downregulate N signaling. *aph-1* is part of an enzyme complex that is  
262 involved in the proteolytic cleavage of the N transmembrane protein, which allows the N  
263 intracellular domain to translocate into the nucleus to activate its target genes (reviewed  
264 in 70). Undamaged *aph-1*<sup>D35/+</sup> discs showed significantly reduced N signaling (Fig S4H,  
265 S4I and S4J). N signaling was also reduced in regenerating *aph-1*<sup>D35/+</sup> discs at R24 (Fig  
266 S4K, S4L and S4M). Regenerating *aph-1*<sup>D35/+</sup> discs resulted in adult wings that showed

267 a frequency of margin defects very similar to *brat*<sup>1/+</sup> (Fig S4N), consistent with reduced  
268 N activity causing wing margin errors. Importantly, the *aph-1*<sup>D35</sup> mutant was unable to  
269 rescue the loss of *brat* margin phenotype (Fig S4N). Thus, while Brat constrains N  
270 signaling during regeneration, the elevated N signaling in *brat*<sup>1/+</sup> mutants does not  
271 cause the margin cell-fate specification defects.

272

### 273 ***brat* specifies margin fate by controlling the expression of Cut and Achaete**

274 To understand how patterning was disrupted in *brat*<sup>1/+</sup> regenerating discs, we examined  
275 expression of margin cell-fate genes. Cut (Ct) expression was present along the DV  
276 boundary in both undamaged control and *brat*<sup>1/+</sup> discs (Fig 4K and 4L), consistent with  
277 our results showing that adult undamaged *brat*<sup>1/+</sup> wings do not have margin defects (Fig  
278 S1D). In control regenerating discs, Ct expression was detected at the DV boundary at  
279 R72, which is when regeneration and repatterning are largely complete (Fig 4M). By  
280 contrast, Ct expression was either not observed in *brat*<sup>1/+</sup> discs or was still missing in  
281 segments of the DV boundary at R72 (Fig 4N and 4O). These results indicate a specific  
282 error in cell-fate specification, as the DV boundary was intact at R72 (Fig S4A and S4B).  
283 Undamaged control and *brat*<sup>1/+</sup> discs also showed appropriate Ac expression in two  
284 stripes of cell directly flanking the DV boundary in the anterior half of the disc (Fig 4P  
285 and 4Q). Ac expression was also detected in control regenerating discs at R72 (Fig 4R).  
286 While Ac-expressing cells appeared in *brat*<sup>1/+</sup> discs, they were not clearly separated  
287 across the DV boundary (Fig 4S). This finding is consistent with previous reports  
288 showing that Ct suppresses Ac at the margin, and mutations in *ct* lead to aberrant

289 expression of Ac at the DV boundary, followed by degeneration of the wing margin  
290 through cell death (71,72).

291

## 292 **High Myc expression perturbs margin cell-fate specification during regeneration**

293 Our results show that Brat both restricts regenerative growth and ensures correct cell-  
294 fate specification at the wing margin. Interestingly, JNK signaling in regenerating tissue  
295 can cause aberrant posterior-to-anterior cell-fate changes, which can be suppressed by  
296 a regeneration-specific protective factor, Taranis, to ensure correct patterning of the  
297 regenerating tissue (32). Therefore, we wondered whether unconstrained regenerative  
298 growth, or unconstrained expression of growth drivers, could also have deleterious side  
299 effects such as loss of margin cell fates. As Wg expression is normal during late  
300 regeneration and we have ruled out elevated N signaling as the causative factor for the  
301 cell-fate errors that occurred in *brat*<sup>1/+</sup> regenerating discs, we wondered whether high  
302 Myc expression could cause the margin defects.

303

304 Brat overexpression can suppress Myc in wing imaginal disc cells (56), and in  
305 undamaged wing discs Brat protein levels were elevated at the DV boundary where Myc  
306 was reduced (Fig 5A-A''), suggesting that Brat may regulate Myc at the DV boundary.  
307 To test whether high Myc levels could cause margin defects during regeneration and  
308 phenocopy the *brat* mutation, we overexpressed Myc in the wing pouch during the 24-  
309 hour ablation period. Myc was highly upregulated at R0 (Fig 5B, 5C and 5D), but Myc  
310 levels had returned to normal by R24 (Fig 5D). Overexpression of Myc also resulted in a

311 significantly higher number of proliferating nuclei in the regenerating tissue at R0,  
312 similar to *brat*<sup>1/+</sup> discs (Fig 5E, 5F and 5G). Remarkably, we observed that adult wings  
313 resulting from Myc-overexpressing regenerating discs also showed margin defects  
314 similar to the *brat*<sup>1/+</sup> wings (Fig 5H and 5I). Moreover, the frequency of margin defects  
315 in the adult wings resulting from Myc-overexpressing regenerating discs was even  
316 higher than in adult wings resulting from *brat*<sup>1/+</sup> regenerating discs (Fig 5J),  
317 demonstrating that elevated levels of Myc alone can cause errors in margin cell-fate  
318 specification. Overexpressing Myc for a 24-hour window during normal development  
319 resulted in 3 adult wings out of 730 that showed any margin defects (Fig S5A). Even in  
320 these wings, only one segment of the margin was affected. These data indicate that  
321 high Myc levels do not cause cell-fate specification errors during normal development,  
322 and the extensive loss of wing margin induced by high Myc expression is a  
323 regeneration-specific phenotype. Similar to *brat*<sup>1/+</sup> discs, *ap-lacZ* expression showed  
324 that the compartment boundary was not compromised in Myc-overexpressing  
325 regenerating discs (Fig 5K and 5L). Likewise, Ct expression was missing in segments at  
326 the DV boundary as in the *brat*<sup>1/+</sup> discs (Fig 5M and 5N).

327

328 We hypothesized that if the *brat* phenotype was due to elevated Myc levels, we would  
329 be able to rescue the phenotype by reducing Myc levels in the *brat* mutant. For this  
330 purpose, we used *dm*<sup>4</sup>, which is a null allele of Myc (73). Surprisingly, we observed that  
331 the *dm*<sup>4/+</sup> mutants alone showed margin defects in the regenerated wings at a  
332 frequency similar to *brat*<sup>1/+</sup>, even though the *dm*<sup>4/+</sup>; *brat*<sup>1/+</sup> double mutant showed  
333 slightly reduced frequency of margin defects (Fig S5B). To confirm that Myc levels were



334 reduced in the *dm<sup>4</sup>/+* mutants, we quantified Myc protein through immunostaining. We  
335 observed that there was no significant difference in Myc expression levels between the  
336 *dm<sup>4</sup>/+* mutant and control, both during development and regeneration (Fig S5C and  
337 S5D). Indeed, Myc levels were trending higher in the *dm<sup>4</sup>/+* discs during regeneration.  
338 The failure of the *dm<sup>4</sup>* mutation to reduce Myc levels could be due to compensatory  
339 expression of the functional copy of the Myc locus. We next tried reducing Myc levels  
340 through RNAi. Despite the RNAi expression being transient in our system, and only  
341 occurring in cells that survive ablation, RNAi-mediated persistent knockdown has  
342 worked for multiple genes, likely due to the shadow RNAi effect (74). Two RNAi lines  
343 could significantly reduce Myc levels during normal development when expressed  
344 during early third instar (Fig S5E). However, when Myc RNAi was expressed during the  
345 24-hour ablation period, Myc levels were not reduced at either R0 or R24, with one Myc  
346 RNAi line showing significantly higher levels of Myc compared to the control (Fig S5F).  
347 Thus, compensatory regulation of Myc expression during regeneration prevented us  
348 from testing whether reduction in Myc could rescue the *brat*/*+* phenotype.

349

350 Interestingly, animals that overexpressed Myc in the wing pouch during ablation did not  
351 undergo a regeneration-induced pupariation delay (Fig S5G), suggesting that Brat  
352 regulates the entry into metamorphosis independently of its regulation of Myc.  
353 Therefore, not all loss of Brat effects are mediated through Myc.

354

355 **Driving growth in multiple ways can disrupt patterning during regeneration**

356 Myc is an important driver of regenerative growth, and yet, we found that cell-fate  
357 specification during regeneration can be negatively affected if Myc levels are left  
358 unchecked. To test whether the aberrant patterning was a specific result of high Myc  
359 levels or whether increases in growth and proliferation could, in general, cause margin  
360 defects, we sought to overexpress other growth drivers such as *yorkie (yki)* and *string*  
361 (*stg*).

362

363 Overexpressing *yki* and *stg* in the wing imaginal disc during the 24-hour ablation period  
364 caused the resulting adult wings to be much larger than controls that had also  
365 undergone damage and regeneration (Fig 6A), indicating that *yki* and *stg* are both able  
366 to drive regenerative growth. In both of these cases, no regeneration-induced  
367 pupariation delay was seen, making the enhanced regeneration even more remarkable  
368 (Fig 6B). Intriguingly, we observed loss of margin tissue after *yki* overexpression during  
369 regeneration similar to *brat<sup>1</sup>/+* wings (Fig 6C, 6D and 6F) but did not observe many  
370 margin defects for wings that had experienced *stg* overexpression during regeneration.  
371 By contrast, overexpression of *stg* produced various patterning errors within the wing  
372 blade, different from the defects seen in *brat<sup>1</sup>/+* wings (Fig 6E and 6F). Similar to both  
373 regenerating *brat<sup>1</sup>/+* and Myc-overexpressing discs, *yki* overexpression during ablation  
374 led to loss of Ct expression at the DV boundary (Fig 6G and 6H), explaining the adult  
375 phenotype. Importantly, *yki* overexpression led to increased Myc expression in R24  
376 discs (Fig 6I, 6J and 6K), suggesting that ectopically increased Yki levels likely  
377 suppressed margin cell-fate specification by inducing Myc overexpression. Thus,  
378 overexpression of pro-growth factors can disrupt patterning in regenerating tissue in a

379 variety of ways. However, since overexpression of *stg* did not cause loss of margin, this  
380 phenotype is not caused by enhancing growth in general.

381

### 382 **Loss of cell-fate specification may be due to elevated expression of Chinmo**

383 Given that driving growth by overexpressing String does not cause loss of wing margin  
384 cell fates in regenerating tissue, this phenotype might not be caused by increased  
385 growth overall but by misregulation of one or more targets of the Myc transcription  
386 factor. We have previously identified the gene *Chronologically inappropriate*  
387 *morphogenesis (chinmo)* as a novel regulator of regeneration (50). Chinmo is a  
388 transcription factor that regulates the balance between a proliferative self-renewal state  
389 and a differentiated state in stem cells (75,76). Recent work has shown that *chinmo* also  
390 maintains wing epithelial cells in an unspecified state during development by inhibiting  
391 *ct* expression, and enhances regenerative potential (77). While *chinmo* mRNA is a  
392 direct Brat target (39), *chinmo* is regulated at the level of transcription in the wing  
393 imaginal disc (77). Therefore, we wondered whether *chinmo* could be misregulated  
394 downstream of Myc in the *brat<sup>1/+</sup>* regenerating discs, leading to inhibition of Ct  
395 expression. Interestingly, the model organism Encyclopedia of Regulatory Networks  
396 (modERN) data show Myc binding near the *chinmo* promoter, supporting this  
397 hypothesis (78). Chinmo levels were not significantly different in undamaged control and  
398 *brat<sup>1/+</sup>* discs (Fig 7A, 7B and 7E). However, Chinmo levels were significantly higher in  
399 *brat<sup>1/+</sup>* regenerating discs compared to control regenerating discs at R24 (Fig 7C, 7D

400 and 7F). Thus, the loss of *ct* expression and loss of margin cell fates in *brat/+*  
401 regenerating discs are likely due, at least in part, to upregulation of *chinmo*.

402

403 To confirm regulation of *chinmo* downstream of Myc, we examined Chinmo levels in  
404 regenerating discs over-expressing Myc. Chinmo levels were elevated in Myc-  
405 overexpressing discs at R0, when Myc overexpression was the highest (Fig 5D and Fig  
406 7G-I). However, Chinmo levels were restored to control levels by R24 in Myc-  
407 overexpressing discs, consistent with the return of Myc levels to normal at this time  
408 point (Fig 5D and Fig S6A-C). Interestingly, Myc and Chinmo expression almost  
409 perfectly co-localized, consistent with the hypothesis that Myc regulates Chinmo  
410 expression (Fig S6A-B”). Additionally, we observed a high correlation between Myc and  
411 Chinmo expression levels in individual discs (Fig S6D-E). While Myc likely regulates  
412 Chinmo, the increase in Chinmo levels at R0 may not be the only contributing factor  
413 towards *ct* misregulation in Myc-overexpressing regenerating discs, and other Myc  
414 targets may also be involved.

415

416 Based on our findings, we propose a model in which pro-growth factors are important  
417 for coordinating regenerative growth, but can lead to deleterious side effects by  
418 perturbing cell-fate gene expression and patterning. *Brat* prevents a prolonged  
419 proliferative and unspecified state in regenerating wing discs by inhibiting *Wg*, *Ilp8*, *Myc*  
420 and *Chinmo* to enable cessation of growth, induction of cell-fate specification, and entry  
421 into metamorphosis (Fig 8).

422

## 423 **Discussion**

424 Here we have shown that Brat acts as a protective factor during regeneration by  
425 constraining levels of transcription factors such as Myc and Chinmo, which promote  
426 growth and proliferation but also inhibit cell-fate specification. If Brat is unable to  
427 perform its protective function during regeneration, Myc levels increase unchecked,  
428 resulting in misregulation of its targets, including Chinmo and subsequently Ct, causing  
429 loss of proper cell fates at the wing margin. In addition, we have demonstrated that  
430 overexpression of Yki and Stg can both result in different types of patterning defects,  
431 indicating that growth regulators must be tightly controlled during regeneration to ensure  
432 correct establishment of cell fates.

433

434 Myc is broadly used across organisms to promote proliferation and prevent  
435 differentiation (79,80), and Myc is strongly activated in the regenerating tissue and is  
436 required for efficient regeneration. Importantly, increased Myc levels can enhance  
437 regeneration in both younger discs as well as mature discs that normally regenerate  
438 poorly (23,25). Nevertheless, we have found that while these abnormally high Myc  
439 levels can enhance regenerative growth, they also perturb differentiation by  
440 misregulating target genes such as Chinmo. Thus, enhanced regeneration happens at  
441 the expense of correct cell-fate specification, and the regenerating tissue must employ  
442 mechanisms to suppress high regeneration signaling.

443

444 Brat promotes differentiation in *Drosophila* larval neuroblasts and ovarian germline stem  
445 cells by asymmetrically segregating to one of the daughter cells where it post-  
446 transcriptionally inhibits Myc (41,42). This daughter cell is then able to differentiate while  
447 the other daughter cell remains a stem cell. In *brat* mutants, progeny of stem cells are  
448 unable to differentiate, resulting in an abnormal expansion of the stem-cell population,  
449 which can form tumors in the brain (40–43). Thus, Brat protects these tissues from  
450 overproliferation of stem cells. Importantly, wing imaginal disc regeneration is not stem-  
451 cell based, but in wing disc regeneration Brat also inhibits Myc to prevent excessive  
452 proliferation and allow correct cell-fate specification. Based on these similarities in  
453 function, Brat likely acts as a protective factor across different biological contexts,  
454 including regeneration that does not employ stem cells.

455

456 We have previously shown that JNK signaling can induce posterior-to-anterior fate  
457 changes in regenerating wing discs, which can be prevented by the protective factor  
458 Taranis (31). We have now identified a second protective factor, Brat, which is needed  
459 specifically for correct patterning of the regenerating wing margin. Interestingly, while  
460 elevated JNK signaling causes anterior markers to appear in the posterior wing  
461 compartment, it does not cause margin loss, indicating that posterior fate and margin  
462 fate are regulated in distinct ways (32). Protective factors such as Tara and Brat are  
463 important for maintaining the balance between fate specification and pluripotency, but  
464 they do so by using very different mechanisms. While the molecular function of Tara is  
465 unknown, genetic interactions in *Drosophila* coupled with the demonstrated functions of  
466 its vertebrate homologs suggest it regulates gene expression at the level of transcription

467 and chromatin (81–84). By contrast, Brat acts as a translational repressor, and  
468 suppresses its targets through mRNA degradation (85,86). Tara is required to prevent  
469 fate changes induced by JNK signaling, which is necessary for wound repair and  
470 regeneration but is not required for the normal development of the wing. By contrast,  
471 Myc is required for both development and regeneration of the wing disc, but is  
472 constrained by Brat only during regeneration.

473

474 An important open question in the field of regeneration is how patterning and cell-fate  
475 specification are regulated in regenerating tissue, and whether these mechanisms are  
476 different from the developmental program. Many studies have highlighted that  
477 regeneration must be distinct from development in some ways, because the damaged  
478 tissue is already complexly patterned, and the wound-healing response causes strong  
479 activation of signaling pathways, some of which are not normally present in developing  
480 tissue (1,3,25,30–35). We are just beginning to identify regulators like Brat that are  
481 critical for attenuating regenerative growth signaling and shielding the regenerating  
482 tissue from the harmful side effects of such signaling. Identification of these regulators  
483 highlights the fact that the regenerating tissue behaves distinctly from normally  
484 developing tissue. Since regeneration signaling is complex and comprises many  
485 signaling pathways, many additional factors that play protective roles during  
486 regeneration likely exist. Identification of these additional factors will be important for the  
487 development of more useful clinical therapies targeted at tissue repair, which currently  
488 focus on replicating development without accounting for the deleterious side effects of  
489 exogenous and unconstrained pro-growth signaling.

490

## 491 **Materials and Methods**

### 492 **Ablation and Regeneration experiments**

493 Ablation experiments were done as previously described (32). Briefly, cell death was  
494 induced by driving *UAS-reaper* under *rotund-GAL4*, with *GAL80<sup>ts</sup>* for temporal control.  
495 Animals were raised at 18°C for 7 days after egg lay (AEL) (early third instar) before  
496 they were shifted to a 30°C circulating water bath for 24 hours. Animals were brought  
497 back to 18°C to allow regeneration. Wing discs were dissected at different time points  
498 after the end of ablation, or the animals were allowed to grow to adulthood to observe  
499 the adult wing phenotype. Undamaged control wing discs were the same genotype as  
500 the experimental animals but kept at 18°C and dissected on day 9 after egg lay, which  
501 is mid-late third instar. For undamaged adult wings, the animals were kept at 18°C until  
502 after eclosion. Any other undamaged conditions used are mentioned specifically in the  
503 figure legends.

504

### 505 **Fly stocks**

506 The following *Drosophila* stocks were used: *w<sup>1118</sup>* (wild type)(87), *w<sup>1118</sup>; rnGAL4, UAS-*  
507 *rpr, tubGAL80ts/TM6B, tubGAL80* (23), *brat<sup>1</sup>* (88)(FBst0003988), *brat<sup>192</sup>* and *brat<sup>150</sup>*  
508 (52)(a gift from Juergen Knoblich, Austrain Academy of Science), *brat<sup>11</sup>* (53)(a gift from  
509 Chen-Yu Lee, University of Michigan), *Df(2L)Exel8040* (54)(FBst0007847),  
510 *Df(2L)TE37C-7* (55)(FBst0006089), *rnGAL4, tubGAL80ts/TM6B* (23),



511 *P{Trip.HM05078}attP2* (called *bratRNAi* in the text)(FBst0028590), *P{CaryP}attP2*  
512 (called *attP2* control in the text)(FBst0036303), *{PZ}ap<sup>rK568</sup>* (89)(FBst0005374), *NRE-*  
513 *GFP* (68)(FBst0030727), *UAS-Nintra* (a gift from Gary Struhl, Columbia University),  
514 *aph-1<sup>D35</sup>* (90)(FBst0063242), *UAS-Myc* (91)(FBst0009674), *UAS-yki*  
515 (92)(FBst0028836), *UAS-stg* (FBst0004778), *dm<sup>4</sup>* (73), *P{GD1419}v2947* (called  
516 *MycRNAi#1* in the text)(VDRC ID# 2947) and *P{GD1419}v2948* (called *MycRNAi#2* in  
517 the text)(VDRC ID# 2948), *P{GD6000}v15293* (called control in the text) (VDRC ID#  
518 15293)(93). All fly stocks are available from the Bloomington Drosophila Stock Center  
519 unless stated otherwise.

520

## 521 **Pupariation timing**

522 Pupariation experiments were performed in a similar manner to the ablation  
523 experiments. Starting at day 9, newly formed pupal cases were counted in each vial.  
524 Pupal cases were counted every 24 hours, up until day 15. Pupariation rates from three  
525 independent experiments were used to calculate the average plotted in the graphs.

526

## 527 **Immunohistochemistry**

528 Immunostaining was carried out as previously described (23). Primary antibodies were  
529 rat anti-Brat (1:200) (37) (a gift from Robin Wharton, Ohio State University), mouse anti-  
530 Nubbin (1:500) (94) (a gift from Steve Cohen, University of Copenhagen), rabbit anti-  
531 Phospho-Histone H3 (1:500) (Millipore), mouse anti-Wingless (1:100) (The  
532 Developmental Studies Hybridoma Bank [DSHB]), rabbit anti-dMyc (1:500) (Santa Cruz

533 Biotechnologies), mouse anti- $\beta$ gal (1:100) (DSHB), mouse anti-Cut (1:10) (DSHB),  
534 mouse anti-Achaete (1:10)(DSHB), rat anti-Chinmo (1:500) (a gift from Nick Sokol,  
535 Indiana University). The Developmental Studies Hybridoma Bank (DSHB) was created  
536 by the NICHD of the NIH and is maintained at the University of Iowa, Department of  
537 Biology, Iowa City, IA 52242.

538

539 Secondary antibodies were AlexaFluor probes (1:1000) (Life Technologies). DNA was  
540 marked using TO-PRO3 (1:500) (Life Technologies) or DAPI (1:5000 of 0.5 mg/mL  
541 stock) (Sigma). Discs were mounted in Vectashield mounting medium (Vector  
542 Laboratories).

543

544 Discs were imaged on a Zeiss LSM 510 or a Zeiss LSM 700 confocal microscope.  
545 Parameters for imaging were identical for quantified images. Images were processed  
546 using ZEN lite (Zeiss), ImageJ (NIH) and Photoshop (Adobe). Maximum intensity  
547 projections were created for the confocal images. Fluorescence intensity was measured  
548 within the wing pouch as marked by anti-Nubbin or by using the morphology of the  
549 undamaged wing disc. Myc and Chinmo intensities were measure by outlining the  
550 region expressing elevated Myc or Chinmo levels. *NRE-GFP* intensity was measured by  
551 outlining the GFP-expressing region at the DV boundary.

552

553 **Adult wing quantifications**

554 Adult wings were mounted in Gary's Magic Mount (Canada balsam [Sigma] dissolved in  
555 methyl salicylate [Sigma]). Images were taken with an Olympus SZX10 microscope with  
556 an Olympus DP21 camera using the CellSens Dimension software (Olympus).

557

558 All adult wings that were 75% or 100% the size of a normal wing were used to quantify  
559 the loss of the wing margin. The wing margin was divided into five segments defined by  
560 where the wing veins intersect the margin. Each wing was scored for the number of  
561 segments with missing margin to assess the extent of the patterning defect.

562 Percentages from the three independent experiments were used to calculate averages  
563 plotted in the graphs. The area of undamaged and regenerated wings was measured  
564 using ImageJ (NIH). ImageJ was also used to measure the percentage of linear length  
565 of margin lost for the entire perimeter of the wing. Graphs were plotted using Excel and  
566 Graphpad Prism 7.

567

568

## 569 **qPCR**

570 For quantitative PCR (qPCR), 40-60 wing imaginal discs were collected in Schneider's  
571 medium and stored at -80°C. RNA was extracted using the Qiagen RNeasy Mini Kit  
572 (#74104), and cDNA synthesis was performed using the Superscript III First Strand  
573 Synthesis kit (#11752-050). qPCR reactions using the Power SYBR Green MasterMix  
574 (ABI) were run on the ABI Step One Plus Real Time PCR System. The experiment  
575 consisted of 3 biological replicates. For each biological replicate there were three  
576 technical replicates. Gene expression was analyzed by the  $\Delta\Delta C_t$  method and

577 normalized to *Gapdh2* expression. The following primers were used: *Gapdh2* forward  
578 primer (GTGAAGCTGATCTCTTGGTACGAC), reverse primer  
579 (CCGCGCCCTAATCTTTAACTTTTAC) (95), and *ilp8* primers used from Qiagen  
580 (QT00510552).

581

## 582 **Acknowledgements**

583 The authors would like to thank Amanda Brock and Sumbul Khan for critical reading of  
584 the manuscript and helpful discussions; Juergen Knoblich, Chen-Yu Lee, Gary Struhl,  
585 Robin Wharton, Nick Sokol, the Bloomington Drosophila Stock Center (NIH  
586 P40OD018537), Vienna Drosophila Resource Center and the Developmental Studies  
587 Hybridoma Bank for reagents.

588

## 589 **References**

- 590 1. Bosch M, Serras F, Martín-Blanco E, Baguñà J. JNK signaling pathway required  
591 for wound healing in regenerating Drosophila wing imaginal discs. *Dev Biol.* 2005  
592 Apr;280(1):73–86.
- 593 2. Bergantinos C, Corominas M, Serras F. Cell death-induced regeneration in wing  
594 imaginal discs requires JNK signalling. *Development.* 2010 Apr 1;137(7):1169–79.
- 595 3. Bosch M, Bishop S-A, Baguna J, Couso J-P. Leg regeneration in Drosophila  
596 abridges the normal developmental program. *Int J Dev Biol.* 2010;54(8-9):1241–50.
- 597 4. Tasaki J, Shibata N, Sakurai T, Agata K, Umesono Y. Role of c-Jun N-terminal

- 598 kinase activation in blastema formation during planarian regeneration: JNK activation in  
599 planarian regeneration. *Dev Growth Differ.* 2011 Apr;53(3):389–400.
- 600 5. Martín R, Pinal N, Morata G. Distinct regenerative potential of trunk and  
601 appendages of *Drosophila* mediated by JNK signalling. *Development.* 2017 Nov  
602 1;144(21):3946–56.
- 603 6. Bando T, Ishimaru Y, Kida T, Hamada Y, Matsuoka Y, Nakamura T, et al.  
604 Analysis of RNA-Seq data reveals involvement of JAK/STAT signalling during leg  
605 regeneration in the cricket *Gryllus bimaculatus*. *Development.* 2013 Mar 1;140(5):959–  
606 64.
- 607 7. Katsuyama T, Comoglio F, Seimiya M, Cabuy E, Paro R. During *Drosophila* disc  
608 regeneration, JAK/STAT coordinates cell proliferation with Dilp8-mediated  
609 developmental delay. *Proc Natl Acad Sci.* 2015 May 5;112(18):E2327–36.
- 610 8. Verghese S, Su TT. STAT, Wingless, and Nurf-38 determine the accuracy of  
611 regeneration after radiation damage in *Drosophila*. Bosco G, editor. *PLOS Genet.* 2017  
612 Oct 13;13(10):e1007055.
- 613 9. Nakamura T, Mito T, Bando T, Ohuchi H, Noji S. Molecular and Cellular Basis of  
614 Regeneration and Tissue Repair: Dissecting insect leg regeneration through RNA  
615 interference. *Cell Mol Life Sci.* 2008 Jan;65(1):64–72.
- 616 10. Jiang H, Grenley MO, Bravo M-J, Blumhagen RZ, Edgar BA. EGFR/Ras/MAPK  
617 Signaling Mediates Adult Midgut Epithelial Homeostasis and Regeneration in  
618 *Drosophila*. *Cell Stem Cell.* 2011 Jan;8(1):84–95.

- 619 11. Fan Y, Wang S, Hernandez J, Yenigun VB, Hertlein G, Fogarty CE, et al. Genetic  
620 Models of Apoptosis-Induced Proliferation Decipher Activation of JNK and Identify a  
621 Requirement of EGFR Signaling for Tissue Regenerative Responses in *Drosophila*.  
622 Perrimon N, editor. *PLoS Genet*. 2014 Jan 30;10(1):e1004131.
- 623 12. Jin Y, Ha N, Forés M, Xiang J, Gläßer C, Maldera J, et al. EGFR/Ras Signaling  
624 Controls *Drosophila* Intestinal Stem Cell Proliferation via Capicua-Regulated Genes.  
625 Clurman BE, editor. *PLOS Genet*. 2015 Dec 18;11(12):e1005634.
- 626 13. Bando T, Mito T, Maeda Y, Nakamura T, Ito F, Watanabe T, et al. Regulation of  
627 leg size and shape by the Dachshous/Fat signalling pathway during regeneration.  
628 *Development*. 2009 Jul 1;136(13):2235–45.
- 629 14. Sun G, Irvine KD. Regulation of Hippo signaling by Jun kinase signaling during  
630 compensatory cell proliferation and regeneration, and in neoplastic tumors. *Dev Biol*.  
631 2011;350(1):139–51.
- 632 15. Grusche FA, Degoutin JL, Richardson HE, Harvey KF. The  
633 Salvador/Warts/Hippo pathway controls regenerative tissue growth in *Drosophila*  
634 *melanogaster*. *Dev Biol*. 2011 Feb;350(2):255–66.
- 635 16. Hayashi S, Ochi H, Ogino H, Kawasumi A, Kamei Y, Tamura K, et al.  
636 Transcriptional regulators in the Hippo signaling pathway control organ growth in  
637 *Xenopus* tadpole tail regeneration. *Dev Biol*. 2014 Dec;396(1):31–41.
- 638 17. Grijalva JL, Huizenga M, Mueller K, Rodriguez S, Brazzo J, Camargo F, et al.  
639 Dynamic alterations in Hippo signaling pathway and YAP activation during liver

- 640 regeneration. *Am J Physiol-Gastrointest Liver Physiol*. 2014 Jul 15;307(2):G196–204.
- 641 18. Hobmayer B. WNT signalling molecules act in axis formation in the diploblastic  
642 metazoan Hydra. *Nature*. 2000;407(6801):186–9.
- 643 19. Kawakami Y, Rodriguez Esteban C, Raya M, Kawakami H, Marti M, Dubova I, et  
644 al. Wnt/beta-catenin signaling regulates vertebrate limb regeneration. *Genes Dev*. 2006  
645 Dec 1;20(23):3232–7.
- 646 20. McClure KD, Schubiger G. A screen for genes that function in leg disc  
647 regeneration in *Drosophila melanogaster*. *Mech Dev*. 2008 Jan;125(1-2):67–80.
- 648 21. Schubiger M, Sustar A, Schubiger G. Regeneration and transdetermination: The  
649 role of wingless and its regulation. *Dev Biol*. 2010 Nov;347(2):315–24.
- 650 22. Wehner D, Cizelsky W, Vasudevaro MD, Özhan G, Haase C, Kagermeier-  
651 Schenk B, et al. Wnt/ $\beta$ -Catenin Signaling Defines Organizing Centers that Orchestrate  
652 Growth and Differentiation of the Regenerating Zebrafish Caudal Fin. *Cell Rep*. 2014  
653 Feb;6(3):467–81.
- 654 23. Smith-Bolton RK, Worley MI, Kanda H, Hariharan IK. Regenerative Growth in  
655 *Drosophila* Imaginal Discs Is Regulated by Wingless and Myc. *Dev Cell*. 2009  
656 Jun;16(6):797–809.
- 657 24. Hanovice NJ, Leach LL, Slater K, Gabriel AE, Romanovicz D, Shao E, et al.  
658 Regeneration of the zebrafish retinal pigment epithelium after widespread genetic  
659 ablation. Barsh GS, editor. *PLOS Genet*. 2019 Jan 29;15(1):e1007939.
- 660 25. Harris RE. Localized epigenetic silencing of a damage-activated WNT enhancer

- 661 limits regeneration in mature *Drosophila* imaginal discs. *Elife*. 2016;3(5).
- 662 26. Muneoka K. Evidence that patterning mechanisms in developing and  
663 regenerating limbs are the same. *Nature*. 298(5872):369–71.
- 664 27. Gupta V, Gemberling M, Karra R, Rosenfeld GE, Evans T, Poss KD. An Injury-  
665 Responsive Gata4 Program Shapes the Zebrafish Cardiac Ventricle. *Curr Biol*. 2013  
666 Jul;23(13):1221–7.
- 667 28. Roensch K. Progressive Specification Rather than Intercalation of Segments  
668 During Limb Regeneration. *Science*. 2013;342(6164):1375–9.
- 669 29. Mader MM. Photoreceptor Differentiation during Retinal Development, Growth,  
670 and Regeneration in a Metamorphic Vertebrate. *J Neurosci*. 2004 Dec  
671 15;24(50):11463–72.
- 672 30. McCusker CD, Gardiner DM. Positional Information Is Reprogrammed in  
673 Blastema Cells of the Regenerating Limb of the Axolotl (*Ambystoma mexicanum*).  
674 Tsonis PA, editor. *PLoS ONE*. 2013 Sep 27;8(9):e77064.
- 675 31. Myohara M. Differential tissue development during embryogenesis and  
676 regeneration in an annelid. *Dev Dyn*. 2004 Oct;231(2):349–58.
- 677 32. Schuster KJ, Smith-Bolton RK. Taranis Protects Regenerating Tissue from Fate  
678 Changes Induced by the Wound Response in *Drosophila*. *Dev Cell*. 2015 Jul;34(1):119–  
679 28.
- 680 33. Luttrell SM, Gotting K, Ross E, Alvarado AS, Swalla BJ. Head regeneration in  
681 hemichordates is not a strict recapitulation of development: Head Regeneration in



- 682 Hemichordates. *Dev Dyn*. 2016 Dec;245(12):1159–75.
- 683 34. Vizcaya-Molina E, Klein CC, Serras F, Mishra RK, Guigó R, Corominas M.  
684 Damage-responsive elements in *Drosophila* regeneration. *Genome Res*. 2018  
685 Dec;28(12):1852–66.
- 686 35. Sun G, Irvine KD. Control of Growth During Regeneration. In: *Current Topics in*  
687 *Developmental Biology* [Internet]. Elsevier; 2014 [cited 2019 Feb 27]. p. 95–120.  
688 Available from: <https://linkinghub.elsevier.com/retrieve/pii/B9780123914989000036>
- 689 36. Hariharan IK, Serras F. Imaginal disc regeneration takes flight. *Curr Opin Cell*  
690 *Biol*. 2017 Oct;48:10–6.
- 691 37. Sonoda J. *Drosophila* Brain Tumor is a translational repressor. *Genes Dev*. 2001  
692 Mar 15;15(6):762–73.
- 693 38. Loedige I, Stotz M, Qamar S, Kramer K, Hennig J, Schubert T, et al. The NHL  
694 domain of BRAT is an RNA-binding domain that directly contacts the hunchback mRNA  
695 for regulation. *Genes Dev*. 2014 Apr 1;28(7):749–64.
- 696 39. Loedige I, Jakob L, Treiber T, Ray D, Stotz M, Treiber N, et al. The Crystal  
697 Structure of the NHL Domain in Complex with RNA Reveals the Molecular Basis of  
698 *Drosophila* Brain-Tumor-Mediated Gene Regulation. *Cell Rep*. 2015 Nov;13(6):1206–  
699 20.
- 700 40. Arama E, Dickman D, Kimchie Z, Shearn A, Lev Z. Mutations in the  $\beta$ -propeller  
701 domain of the *Drosophila* brain tumor (brat) protein induce neoplasm in the larval brain.  
702 *Oncogene*. 2000;19(33):3706.

- 703 41. Harris RE, Pargett M, Sutcliffe C, Umulis D, Ashe HL. Brat Promotes Stem Cell  
704 Differentiation via Control of a Bistable Switch that Restricts BMP Signaling. *Dev Cell*.  
705 2011 Jan;20(1):72–83.
- 706 42. Betschinger J, Mechtler K, Knoblich JA. Asymmetric Segregation of the Tumor  
707 Suppressor Brat Regulates Self-Renewal in Drosophila Neural Stem Cells. *Cell*. 2006  
708 Mar;124(6):1241–53.
- 709 43. Lee C-Y, Wilkinson BD, Siegrist SE, Wharton RP, Doe CQ. Brat Is a Miranda  
710 Cargo Protein that Promotes Neuronal Differentiation and Inhibits Neuroblast Self-  
711 Renewal. *Dev Cell*. 2006 Apr;10(4):441–9.
- 712 44. Chen G, Kong J, Tucker-Burden C, Anand M, Rong Y, Rahman F, et al. Human  
713 Brat Ortholog TRIM3 Is a Tumor Suppressor That Regulates Asymmetric Cell Division  
714 in Glioblastoma. *Cancer Res*. 2014 Aug 15;74(16):4536–48.
- 715 45. Schwamborn JC, Berezikov E, Knoblich JA. The TRIM-NHL Protein TRIM32  
716 Activates MicroRNAs and Prevents Self-Renewal in Mouse Neural Progenitors. *Cell*.  
717 2009 Mar;136(5):913–25.
- 718 46. Nicklas S, Otto A, Wu X, Miller P, Stelzer S, Wen Y, et al. TRIM32 Regulates  
719 Skeletal Muscle Stem Cell Differentiation and Is Necessary for Normal Adult Muscle  
720 Regeneration. *PLOS ONE*. 2012 Jan 27;7(1):e30445.
- 721 47. Kudryashova E, Kramerova I, Spencer MJ. Satellite cell senescence underlies  
722 myopathy in a mouse model of limb-girdle muscular dystrophy 2H. *J Clin Invest*. 2012  
723 May 1;122(5):1764–76.

- 724 48. Vonesch SC, Lamparter D, Mackay TFC, Bergmann S, Hafen E. Genome-Wide  
725 Analysis Reveals Novel Regulators of Growth in *Drosophila melanogaster*. Barsh GS,  
726 editor. PLOS Genet. 2016 Jan 11;12(1):e1005616.
- 727 49. Skinner A, Khan SJ, Smith-Bolton RK. Trithorax regulates systemic signaling  
728 during *Drosophila* imaginal disc regeneration. Development. 2015 Oct  
729 15;142(20):3500–11.
- 730 50. Khan SJ, Abidi SNF, Skinner A, Tian Y, Smith-Bolton RK. The *Drosophila* Duox  
731 maturation factor is a key component of a positive feedback loop that sustains  
732 regeneration signaling. Bosco G, editor. PLOS Genet. 2017 Jul 28;13(7):e1006937.
- 733 51. Brock AR, Seto M, Smith-Bolton RK. Cap-n-Collar Promotes Tissue  
734 Regeneration by Regulating ROS and JNK Signaling in the *Drosophila melanogaster*  
735 Wing Imaginal Disc. Genetics. 2017 Jul;206(3):1505–20.
- 736 52. Luschig S, Moussian B, Krauss J, Desjeux I, Perkovic J, Nüsslein-Volhard C.  
737 An F1 genetic screen for maternal-effect mutations affecting embryonic pattern  
738 formation in *Drosophila melanogaster*. Genetics. 2004;167(1):325–42.
- 739 53. Wright TR, Beermann W, Marsh JL, Bishop CP, Steward R, Black BC, et al. The  
740 genetics of dopa decarboxylase in *Drosophila melanogaster*. Chromosoma.  
741 1981;83(1):45–58.
- 742 54. Parks AL, Cook KR, Belvin M, Dompe NA, Fawcett R, Huppert K, et al.  
743 Systematic generation of high-resolution deletion coverage of the *Drosophila*  
744 *melanogaster* genome. Nat Genet. 2004 Mar;36(3):288–92.

- 745 55. Stathakis DG. The Genetic and Molecular Organization of the Dopa  
746 Decarboxylase Gene Cluster of *Drosophila Melanogaster*. *Genetics*. 1995;141(2):629–  
747 55.
- 748 56. Ferreira A, Boulan L, Perez L, Milán M. Mei-P26 Mediates Tissue-Specific  
749 Responses to the Brat Tumor Suppressor and the dMyc Proto-Oncogene in *Drosophila*.  
750 *Genetics*. 2014 Sep;198(1):249–58.
- 751 57. Halme A, Cheng M, Hariharan IK. Retinoids Regulate a Developmental  
752 Checkpoint for Tissue Regeneration in *Drosophila*. *Curr Biol*. 2010 Mar;20(5):458–63.
- 753 58. Colombani J. Secreted Peptide Dilp8 Coordinates *Drosophila* Tissue Growth with  
754 Developmental Timing. *Science*. 2012;336(6081):582–5.
- 755 59. Garelli A, Gontijo AM, Miguela V, Caparros E, Dominguez M. Imaginal discs  
756 secrete insulin-like peptide 8 to mediate plasticity of growth and maturation. *Science*.  
757 2012;336(6081):579–82.
- 758 60. Abbott LC, Karpen GH, Schubiger G. Compartmental restrictions and blastema  
759 formation during pattern regulation in *Drosophila* imaginal leg discs. *Dev Biol*.  
760 1981;87(1):64–75.
- 761 61. Ng M, Diaz-Benjumea FJ, Cohen SM. Nubbin encodes a POU-domain protein  
762 required for proximal-distal patterning in the *Drosophila* wing. *Development*.  
763 1995;121(2):589–99.
- 764 62. Komori H, Xiao Q, McCartney BM, Lee C-Y. Brain tumor specifies intermediate  
765 progenitor cell identity by attenuating -catenin/Armadillo activity. *Development*. 2014

- 766 Jan 1;141(1):51–62.
- 767 63. Couso JP, Bate M, Martinez-Arias A. A wingless-dependent polar coordinate  
768 system in *Drosophila* imaginal discs. *Science*. 1993;259(5094):484–9.
- 769 64. Wu DC, Johnston LA. Control of Wing Size and Proportions by *Drosophila* Myc.  
770 *Genetics*. 2010 Jan;184(1):199–211.
- 771 65. Diaz-Benjumea FJ, Cohen SM. Interaction between dorsal and ventral cells in  
772 the imaginal disc directs wing development in *Drosophila*. *Cell*. 1993;75(4):741–52.
- 773 66. Micchelli CA, Rulifson EJ, Blair SS. The function and regulation of cut expression  
774 on the wing margin of *Drosophila*: Notch, Wingless and a dominant negative role for  
775 Delta and Serrate. *Development*. 1997;124(8):1485–95.
- 776 67. Becam I, Milán M. A permissive role of Notch in maintaining the DV affinity  
777 boundary of the *Drosophila* wing. *Dev Biol*. 2008 Oct;322(1):190–8.
- 778 68. Saj A, Arziman Z, Stempfle D, van Belle W, Sauder U, Horn T, et al. A Combined  
779 Ex Vivo and In Vivo RNAi Screen for Notch Regulators in *Drosophila* Reveals an  
780 Extensive Notch Interaction Network. *Dev Cell*. 2010 May;18(5):862–76.
- 781 69. Mukherjee S, Tucker-Burden C, Zhang C, Moberg K, Read R, Hadjipanayis C, et  
782 al. *Drosophila* Brat and Human Ortholog TRIM3 Maintain Stem Cell Equilibrium and  
783 Suppress Brain Tumorigenesis by Attenuating Notch Nuclear Transport. *Cancer Res*.  
784 2016 Apr 15;76(8):2443–52.
- 785 70. Bray SJ. Notch signalling: a simple pathway becomes complex. *Nat Rev Mol Cell*  
786 *Biol*. 2006 Sep;7(9):678–89.

- 787 71. Couso JP, Bishop SA, Arias AM. The wingless signalling pathway and the  
788 patterning of the wing margin in *Drosophila*. *Development*. 1994;120(3):621–36.
- 789 72. Jack J, Dorsett D, Delotto Y, Liu S. Expression of the cut locus in the *Drosophila*  
790 wing margin is required for cell type specification and is regulated by a distant  
791 enhancer. *Development*. 1991;113(3):735–47.
- 792 73. Pierce SB. dMyc is required for larval growth and endoreplication in *Drosophila*.  
793 *Development*. 2004 Apr 21;131(10):2317–27.
- 794 74. Bosch JA, Sumabat TM, Hariharan IK. Persistence of RNAi-Mediated  
795 Knockdown in *Drosophila* Complicates Mosaic Analysis Yet Enables Highly Sensitive  
796 Lineage Tracing. *Genetics*. 2016 May;203(1):109–18.
- 797 75. Dillard C, Narbonne-Reveau K, Foppolo S, Lanet E, Maurange C. Two distinct  
798 mechanisms silence *chinmo* in *Drosophila* neuroblasts and neuroepithelial cells to limit  
799 their self-renewal. *Development*. 2018 Jan 15;145(2):dev154534.
- 800 76. Flaherty MS, Salis P, Evans CJ, Ekas LA, Marouf A, Zavadil J, et al. *chinmo* Is a  
801 Functional Effector of the JAK/STAT Pathway that Regulates Eye Development, Tumor  
802 Formation, and Stem Cell Self-Renewal in *Drosophila*. *Dev Cell*. 2010 Apr;18(4):556–  
803 68.
- 804 77. Narbonne-Reveau K, Maurange C. Developmental regulation of regenerative  
805 potential in *Drosophila* by ecdysone through a bistable loop of ZBTB transcription  
806 factors. *PLOS Biol*. 2019;17(2):e3000149.
- 807 78. Kudron MM, Victorsen A, Gevirtzman L, Hillier LW, Fisher WW, Vafeados D, et

- 808 al. The ModERN Resource: Genome-Wide Binding Profiles for Hundreds of *Drosophila*  
809 and *Caenorhabditis elegans* Transcription Factors. *Genetics*. 2018;208(3):937–49.
- 810 79. Amati B, Land H. Myc—Max—Mad: a transcription factor network controlling cell  
811 cycle progression, differentiation and death. *Curr Opin Genet Dev*. 1994;4(1):102–8.
- 812 80. Takahashi K, Yamanaka S. Induction of Pluripotent Stem Cells from Mouse  
813 Embryonic and Adult Fibroblast Cultures by Defined Factors. *Cell*. 2006  
814 Aug;126(4):663–76.
- 815 81. Hayashi R, Goto Y, Ikeda R, Yokoyama KK, Yoshida K. CDCA4 Is an E2F  
816 Transcription Factor Family-induced Nuclear Factor That Regulates E2F-dependent  
817 Transcriptional Activation and Cell Proliferation. *J Biol Chem*. 2006 Nov  
818 24;281(47):35633–48.
- 819 82. Hsu SI-H, Yang CM, Sim KG, Hentschel DM, O’Leary E, Bonventre JV. TRIP-Br:  
820 a novel family of PHD zinc finger- and bromodomain-interacting proteins that regulate  
821 the transcriptional activity of E2F-1/DP-1. *EMBO J*. 2001 May 1;20(9):2273–85.
- 822 83. Watanabe-Fukunaga R, Iida S, Shimizu Y, Nagata S, Fukunaga R. SEI family of  
823 nuclear factors regulates p53-dependent transcriptional activation. *Genes Cells*.  
824 2005;10(8):851–60.
- 825 84. Calgaro S, Boube M, Cribbs DL, Bourbon H-M. The *Drosophila* gene *taranis*  
826 encodes a novel trithorax group member potentially linked to the cell cycle regulatory  
827 apparatus. *Genetics*. 2002;160(2):547–60.
- 828 85. Laver JD, Li X, Ray D, Cook KB, Hahn NA, Nabeel-Shah S, et al. Brain tumor is

829 a sequence-specific RNA-binding protein that directs maternal mRNA clearance during  
830 the *Drosophila* maternal-to-zygotic transition. *Genome Biol* [Internet]. 2015 Dec [cited  
831 2019 Feb 28];16(1). Available from: <http://genomebiology.com/2015/16/1/94>

832 86. Komori H, Golden KL, Kobayashi T, Kageyama R, Lee C-Y. Multilayered gene  
833 control drives timely exit from the stem cell state in uncommitted progenitors during  
834 *Drosophila* asymmetric neural stem cell division. *Genes Dev*. 2018 Dec 1;32(23-  
835 24):1550–61.

836 87. Hazelrigg T, Levis R, Rubin GM. Transformation of white locus DNA in  
837 *drosophila*: dosage compensation, zeste interaction, and position effects. *Cell*.  
838 1984;36(2):469–81.

839 88. Wright TR, Bewley GC, Sherald AF. The genetics of dopa decarboxylase in  
840 *Drosophila melanogaster*. II. Isolation and characterization of dopa-decarboxylase-  
841 deficient mutants and their relationship to the  $\alpha$ -methyl-dopa-hypersensitive mutants.  
842 *Genetics*. 1976;84(2):287–310.

843 89. Cohen B, McGuffin ME, Pfeifle C, Segal D, Cohen SM. *apterous*, a gene required  
844 for imaginal disc development in *Drosophila* encodes a member of the LIM family of  
845 developmental regulatory proteins. *Genes Dev*. 1992;6(5):715–29.

846 90. Littleton JT, Bellen HJ. Genetic and Phenotypic Analysis of Thirteen Essential  
847 Genes in Cytological Interval 22f1-2; 23b1-2 Reveals Novel Genes Required for Neural  
848 Development in *Drosophila*. *Genetics*. 1994 Sep;138(1):111–23.

849 91. Johnston LA, Prober DA, Edgar BA, Eisenman RN, Gallant P. *Drosophila myc*



- 850 regulates cellular growth during development. *Cell*. 1999;98(6):779–90.
- 851 92. Oh H, Irvine KD. In vivo regulation of Yorkie phosphorylation and localization.  
852 *Development*. 2008 Feb 6;135(6):1081–8.
- 853 93. Dietzl G, Chen D, Schnorrer F, Su K-C, Barinova Y, Fellner M, et al. A genome-  
854 wide transgenic RNAi library for conditional gene inactivation in *Drosophila*. *Nature*.  
855 2007 Jul;448(7150):151–6.
- 856 94. Averof M. Evolutionary origin of insect wings from ancestral gills. *Nature*.  
857 6617(385):627–30.
- 858 95. Classen A-K, Bunker BD, Harvey KF, Vaccari T, Bilder D. A tumor suppressor  
859 activity of *Drosophila* Polycomb genes mediated by JAK-STAT signaling. *Nat Genet*.  
860 2009 Oct;41(10):1150–5.

**Fig 1****A**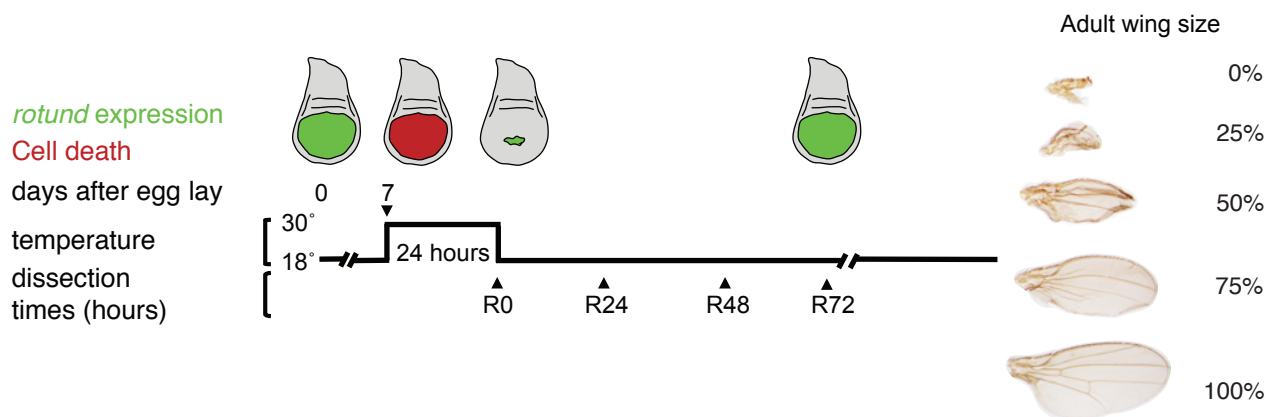**B**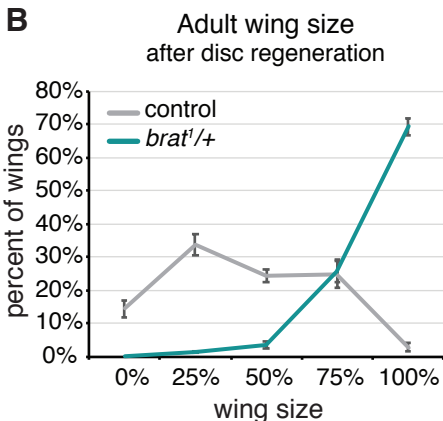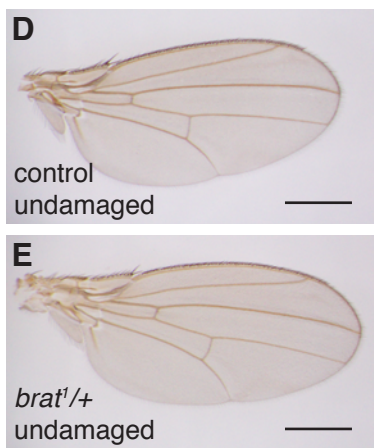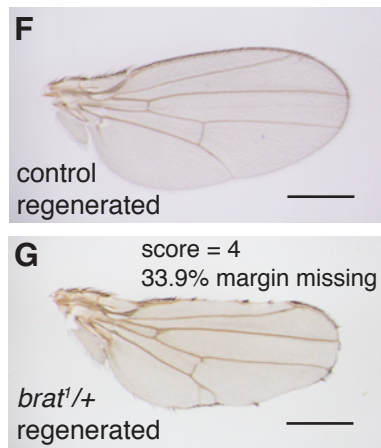**C**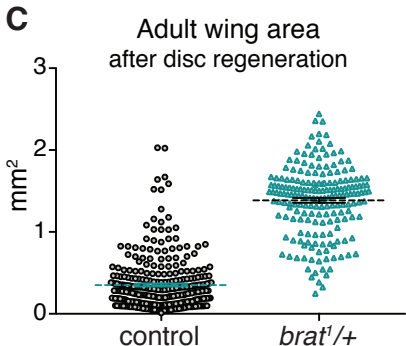**H**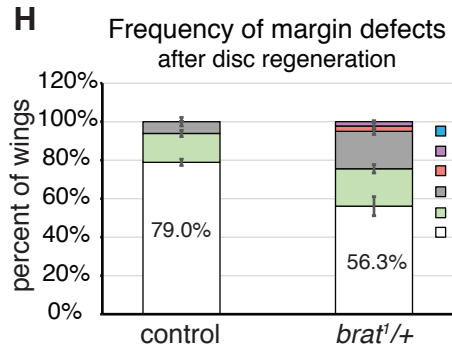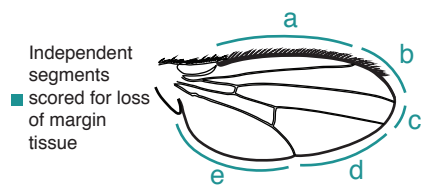**I**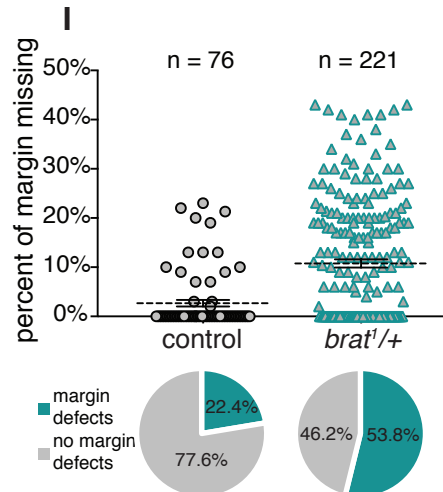

**Fig 1. Enhanced regenerative growth and wing margin cell-fate specification defects in *brat<sup>1/+</sup>* during regeneration.**

(A) The protocol used to study regeneration. Animals were raised at 18°C and shifted to 30°C for 24 hours during early third-instar larval development on day 7 after egg lay (AEL). Larvae were returned to 18°C and were dissected at the time points noted during recovery (R) or allowed to pupariate and eclose. Representative wings depicting the range of adult wing sizes observed after regeneration compared to the size of a normal wing are shown. (B) Adult wing sizes observed after disc regeneration for control (*w<sup>1118</sup>*) (n = 317) and *brat<sup>1/+</sup>* (n = 208) wings, from three independent experiments. (C) Adult wing area after disc regeneration, measured using ImageJ after mounting and imaging wings, for control (*w<sup>1118</sup>*) (n = 309) and *brat<sup>1/+</sup>* (n = 195) wings. p = 2.5158E-119. Wings in (C) are from the same experiments as (B). Note that number of wings in (C) is less for both control and *brat<sup>1/+</sup>* due to some wings being damaged during the mounting process. (D) Undamaged control (*w<sup>1118</sup>*) wing. (E) Undamaged *brat<sup>1/+</sup>* wing. (F) Adult control (*w<sup>1118</sup>*) wing after disc regeneration. (G) Adult *brat<sup>1/+</sup>* wing after disc regeneration. (H) Frequency of margin defects seen in adult wings after disc regeneration for control (*w<sup>1118</sup>*) (n = 93) and *brat<sup>1/+</sup>* (n = 218) wings, from three independent experiments. The wing margin was divided into five segments based on where the veins intersect the margin as shown in the diagram. Each wing was scored for the number of segments that had some margin tissue missing, with wings with a perfectly intact margin scoring at zero. Wing shown in (G) had tissue missing in four segments. (I) Margin tissue lost as a percentage of total wing perimeter for control (*w<sup>1118</sup>*) (n = 76) and *brat<sup>1/+</sup>* (n = 221) wings. p = 9.947E-08. The margin perimeter and

the length of margin tissue lost were measured using ImageJ after mounting and imaging wings. Wings in (I) are from the same experiments as (H). Note that number of wings in the two quantifications is different because we did not quantify wings with length <1.1 mm for males and <1.7 mm for females, to ensure analysis was being carried out on nearly fully regenerated wings. (I). Percentage of wings with no defects fell from 79.0% to 77.6% for control and from 56.3% to 53.8% for *brat<sup>1</sup>/+* wings due to the increased ability to detect lost margin tissue at the higher magnification and resolution achieved by imaging the wings. Wing shown in (G) had 33.9% of margin tissue missing. Error bars mark standard error of the mean (SEM). Student's T-test used for statistical analyses. Scale bars are 0.5 mm.

**Fig 2**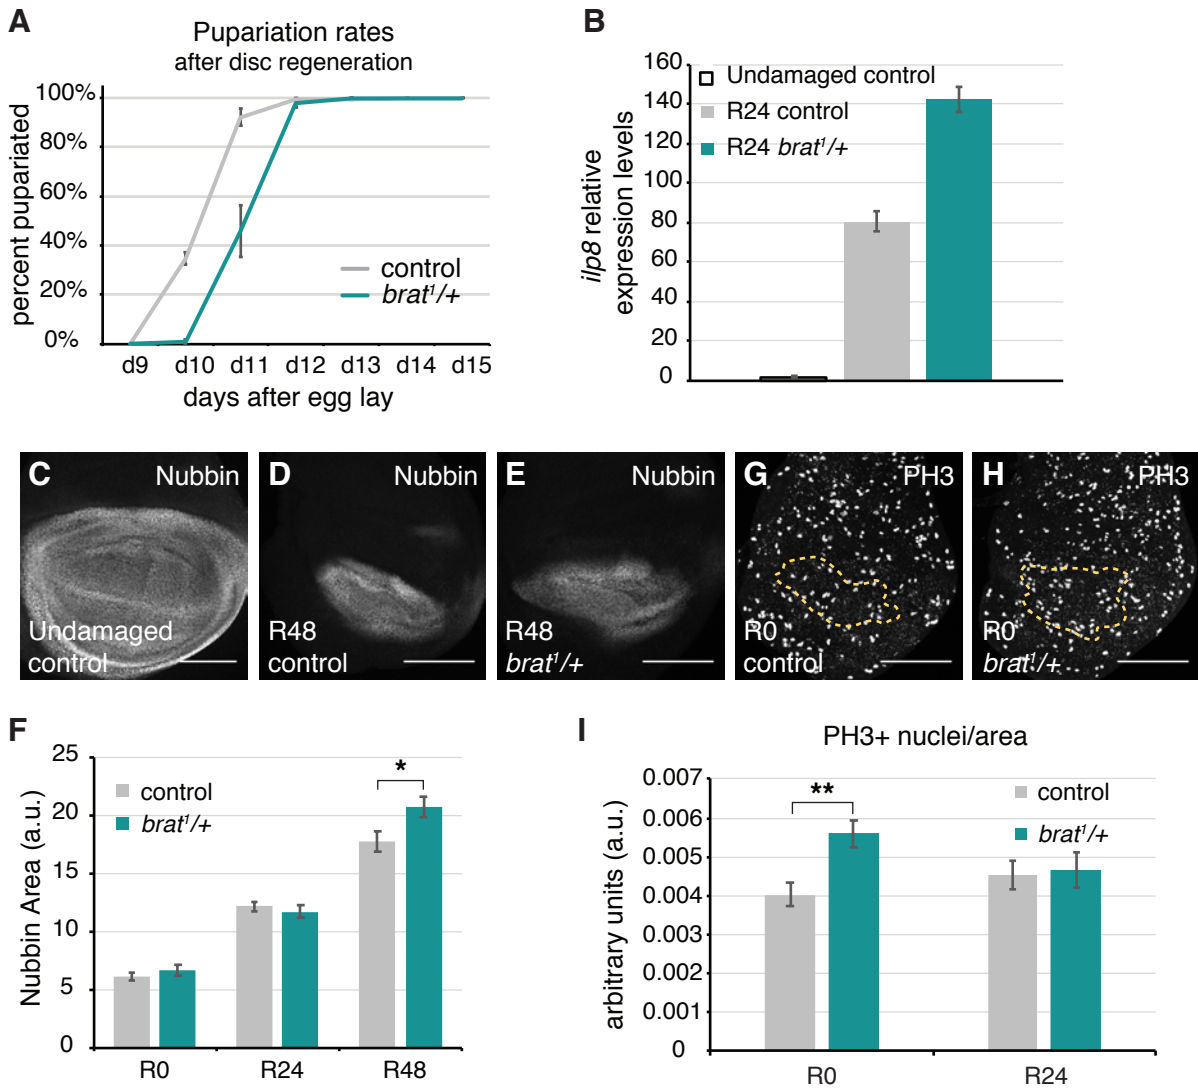

**Fig 2. *brat<sup>1/+</sup>* animals have a regenerative growth advantage.**

(A) Pupariation rates after disc regeneration for control (*w<sup>1118</sup>*) (n = 384) and *brat<sup>1/+</sup>* (n = 107) animals, from three independent experiments. (B) Relative expression levels of *ilp8* for undamaged control (*rnGAL4, tubGAL80ts/TM6B* females crossed to *w<sup>1118</sup>* males and shifted to 30°C for 24 hours at 7 days AEL), R24 control (*w<sup>1118</sup>*) and R24 *brat<sup>1/+</sup>* discs. (C) Anti-Nubbin immunostaining in an undamaged control disc. (D-E) Anti-Nubbin immunostaining in an R48 control (*w<sup>1118</sup>*) disc (D), and an R48 *brat<sup>1/+</sup>* disc (E). (F) Quantification of area of Nubbin-expressing cells for control (*w<sup>1118</sup>*) and *brat<sup>1/+</sup>* discs at R0 (n = 10 and 10), R24 (n = 12 and 12) and R48 (n = 10 and 10). \* p < 0.03. (G-H) Anti-PH3 immunostaining in an R0 control (*w<sup>1118</sup>*) disc (G), and an R0 *brat<sup>1/+</sup>* disc (H). The yellow dashed lines outline the Nubbin-expressing wing pouch. (I) PH3-positive nuclei were counted within the regenerating tissue as marked by Anti-Nubbin co-immunostaining. Quantification of PH3-positive nuclei in Nubbin area for control (*w<sup>1118</sup>*) and *brat<sup>1/+</sup>* discs at R0 (n = 16 and 18) and R24 (n = 15 and 16). \*\* p < 0.002. Error bars represent SEM. Student's T-test used for statistical analyses. Scale bars are 100 μm.

**Fig 3**

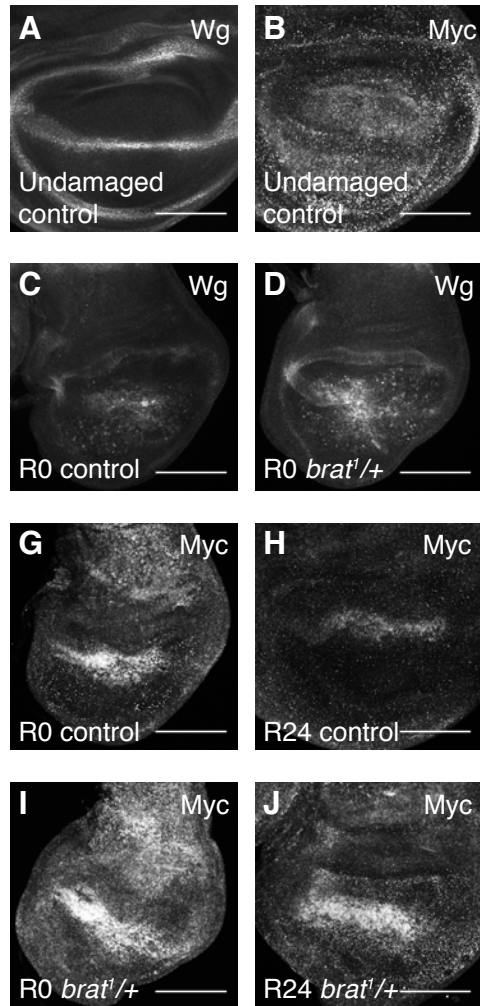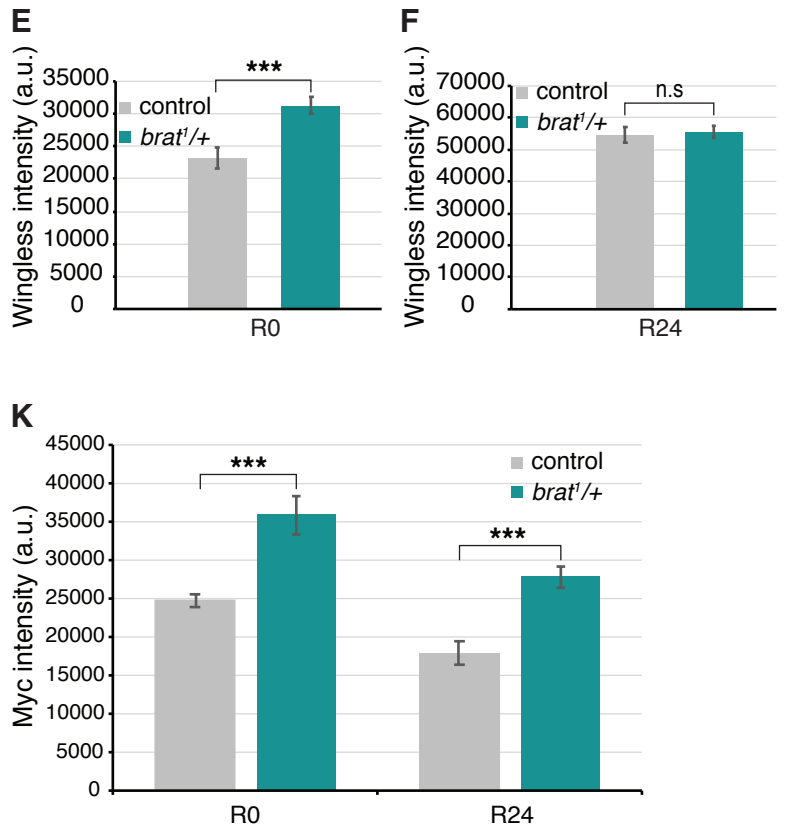

**Fig 3. *brat*<sup>1/+</sup> animals experience elevated regeneration signaling.**

(A) Anti-Wg immunostaining in an undamaged control (*w*<sup>1118</sup>) disc. (B) Anti-Myc immunostaining in an undamaged control (*w*<sup>1118</sup>) disc. (C-D) Anti-Wg immunostaining in an R0 control (*w*<sup>1118</sup>) disc (C) and an R0 *brat*<sup>1/+</sup> disc (D). (E) Quantification of Wg fluorescence intensity in R0 control (*w*<sup>1118</sup>) (n = 13) and R0 *brat*<sup>1/+</sup> (n = 17) discs. \*\*\* p < 0.0006. (F) Quantification of Wg fluorescence intensity in R24 control (*w*<sup>1118</sup>) (n = 12) and R24 *brat*<sup>1/+</sup> (n = 11) discs. Area for fluorescence intensity measurement was defined by the Wg expression domain in the wing pouch. (G-J) Anti-Myc immunostaining in an R0 control (*w*<sup>1118</sup>) disc (G), an R24 control (*w*<sup>1118</sup>) disc (H), an R0 *brat*<sup>1/+</sup> disc (I) and an R24 *brat*<sup>1/+</sup> disc (J). (K) Quantification of Myc fluorescence intensity in R0 control (*w*<sup>1118</sup>) (n = 13), R0 *brat*<sup>1/+</sup> (n = 12), R24 control (*w*<sup>1118</sup>) (n = 13), and R24 *brat*<sup>1/+</sup> (n = 12) discs. Area for fluorescence intensity measurement was defined by the elevated Myc expression domain in the wing pouch. R0 \*\*\* p < 0.0003, R24 \*\*\* p < 0.0001. Error bars represent SEM. Student's T-test used for statistical analyses. Scale bars are 100  $\mu$ m.



**Fig 4**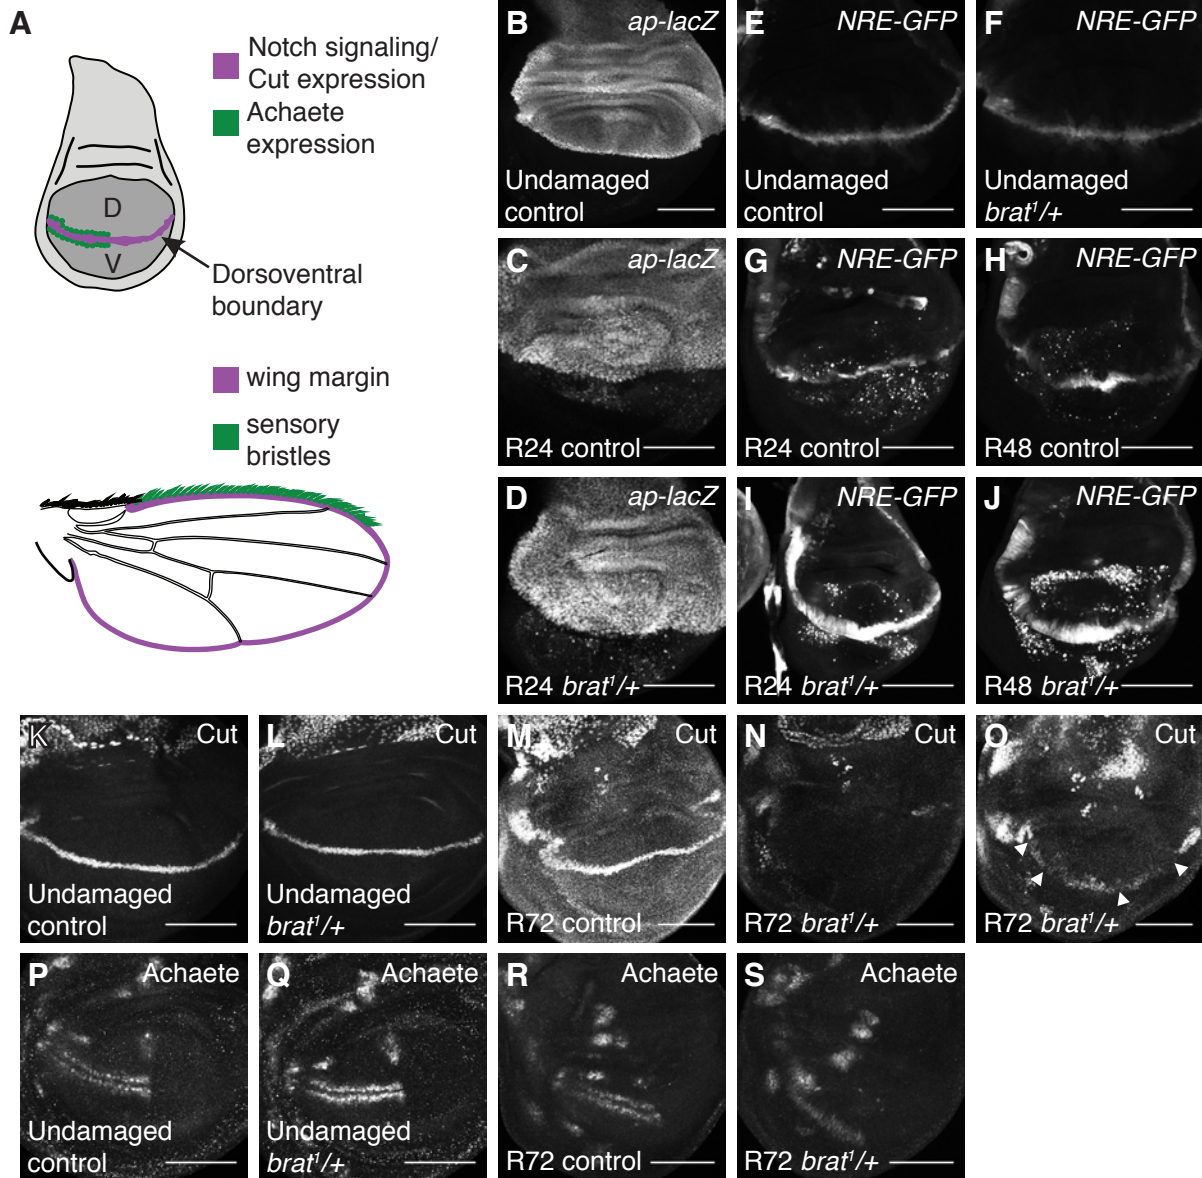

#### Fig 4. *Brat* regulates margin cell-fate specification.

(A) Drawings of a wing imaginal disc and an adult wing. D = dorsal and V = ventral compartments of the wing disc, with the dorsoventral boundary marked in purple. Notch signaling and Cut expression are present at the dorsoventral boundary, which forms the adult wing margin, also marked in purple. Achaete-expressing cells, marked in green, give rise to the sensory bristles at the anterior half of the margin in the adult wing, also marked in green. (B) *ap-lacZ* expression in an undamaged control disc from a third-instar *ap-lacZ/CyO* animal. (C-D) *ap-lacZ* expression in an R24 control (*w<sup>1118</sup>*) disc (C) and an R24 *brat<sup>1/+</sup>* disc (D). (E-F) *NRE-GFP* expression in an undamaged control (*w<sup>1118</sup>*) disc (E) and an undamaged *brat<sup>1/+</sup>* disc (F). (G-J) *NRE-GFP* expression in an R0 control (*w<sup>1118</sup>*) disc (G), an R24 control (*w<sup>1118</sup>*) disc (H), an R0 *brat<sup>1/+</sup>* disc (I) and an R24 *brat<sup>1/+</sup>* disc (J). (K-L) Anti-Ct immunostaining in an undamaged control (*w<sup>1118</sup>*) disc (K) and an undamaged *brat<sup>1/+</sup>* disc (L). (M-O) Anti-Ct immunostaining in an R72 control (*w<sup>1118</sup>*) disc (M) and an R72 *brat<sup>1/+</sup>* discs (N-O). Arrowheads point to loss of Ct expression in (O). (P-Q) Anti-Ac immunostaining in an undamaged control (*w<sup>1118</sup>*) disc (P) and an undamaged *brat<sup>1/+</sup>* disc (Q). (R-S) Anti-Ac immunostaining in an R72 control (*w<sup>1118</sup>*) disc (R) and an R72 *brat<sup>1/+</sup>* disc (S). Scale bars are 100  $\mu$ m.

**Fig 5**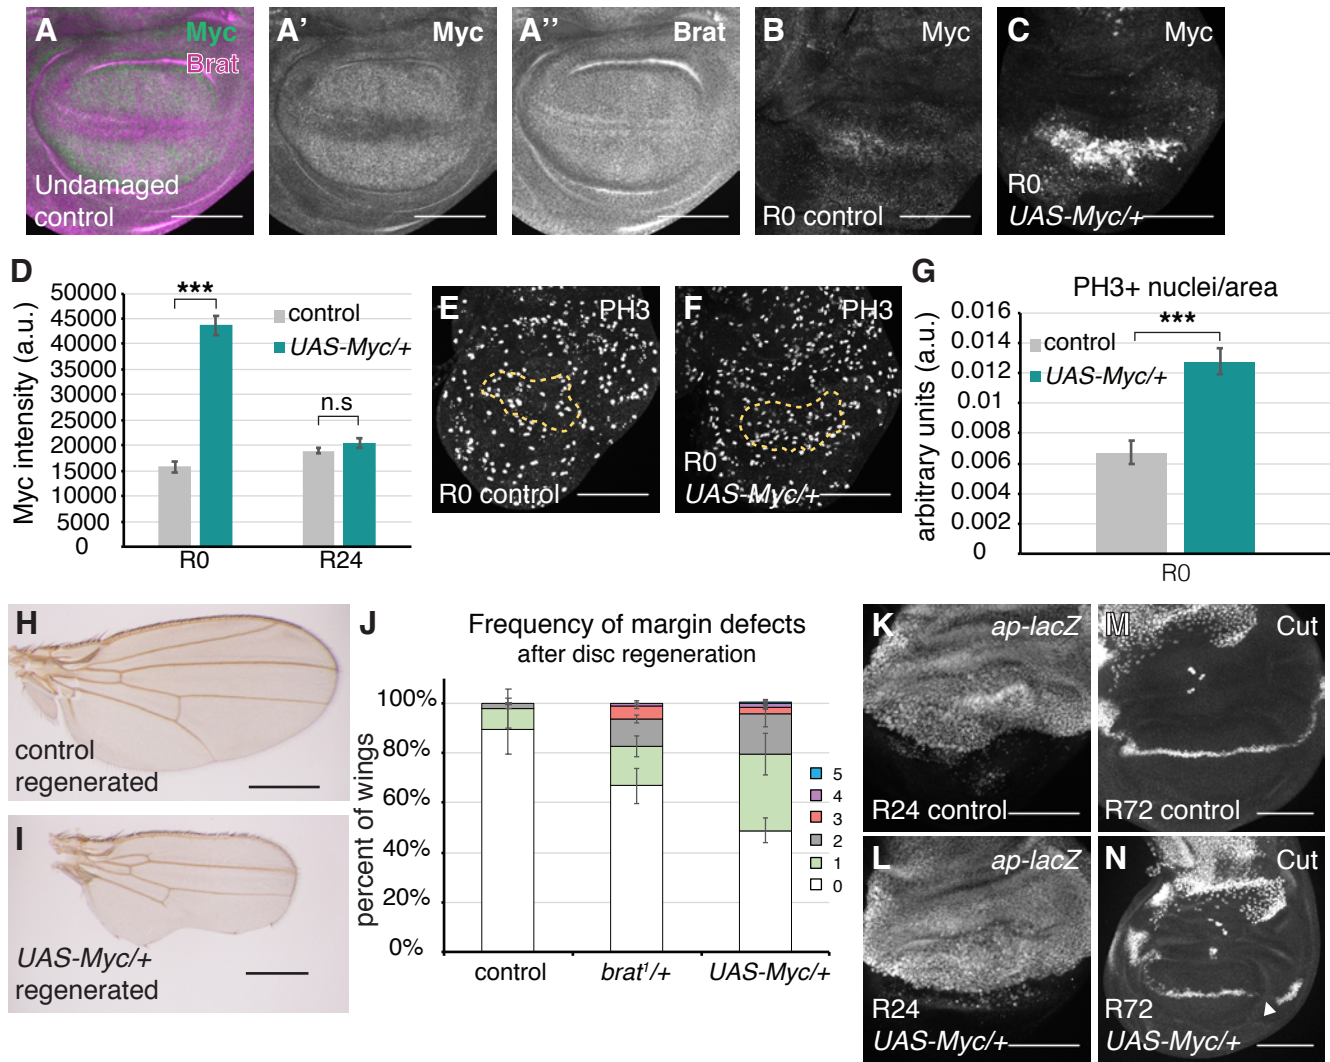

## Fig 5. High Myc expression causes margin defects.

(A-A'') Anti-Myc and Anti-Brat co-immunostaining in an undamaged control disc.

*rnGAL4, GAL80<sup>ts</sup>/attP2* animals were shifted to 30°C on day 7 AEL and dissected 24

hours later. (B-C) Anti-Myc immunostaining in an R0 control (*w<sup>1118</sup>*) disc (B) and an R0

*UAS-Myc/+* disc (C). (D) Quantification of Myc fluorescence intensity in R0 control

(*w<sup>1118</sup>*) (n = 13), R0 *UAS-Myc/+* (n = 12), R24 control (*w<sup>1118</sup>*) (n = 13), and R24 *UAS-*

*Myc/+* (n = 12) discs. Area for fluorescence intensity measurement was defined by the

elevated Myc expression domain in the wing pouch. \*\*\* p = 1.2E-11. (E-F) Anti-PH3

immunostaining in an R0 control (*w<sup>1118</sup>*) disc (E), and an R0 *UAS-Myc/+* disc (F). The

yellow dashed lines outline the Nubbin-expressing wing pouch. (G) PH3-positive nuclei

were counted within the regenerating wing pouch as marked by Anti-Nubbin co-

immunostaining. Quantification of PH3-positive nuclei in the Nubbin area for R0 control

(*w<sup>1118</sup>*) (n = 15) and *UAS-Myc/+* (n = 15) discs. \*\*\* p < 0.00002. (H) Adult control (*w<sup>1118</sup>*)

wing after disc regeneration. (I) Adult *UAS-Myc/+* wing after disc regeneration. (J)

Frequency of margin defects, as quantified in Fig 1H, seen in adult wings after disc

regeneration for control (*w<sup>1118</sup>*) (n = 134), *brat<sup>1/+</sup>* (n = 193) and *UAS-Myc/+* (n = 200)

wings, from three independent experiments. (K-L) *ap-lacZ* expression in an R24 control

(*w<sup>1118</sup>*) disc (K) and an R24 *UAS-Myc/+* disc (L). (M-N) Anti-Ct immunostaining in an

R72 control (*w<sup>1118</sup>*) disc (M) and an R72 *UAS-Myc/+* disc (N). Error bars represent SEM.

Student's T-test used for statistical analyses. Scale bars are 100  $\mu$ m.

**Fig 6**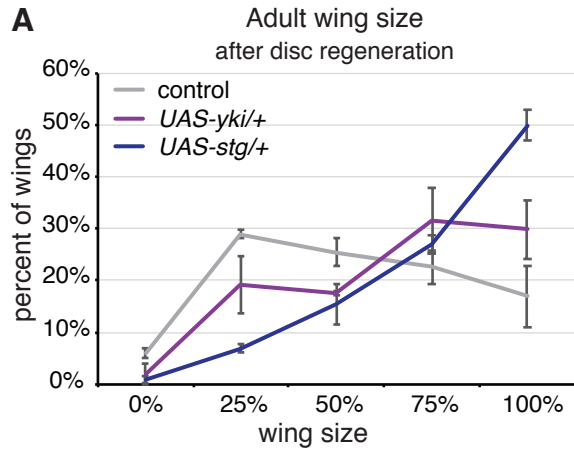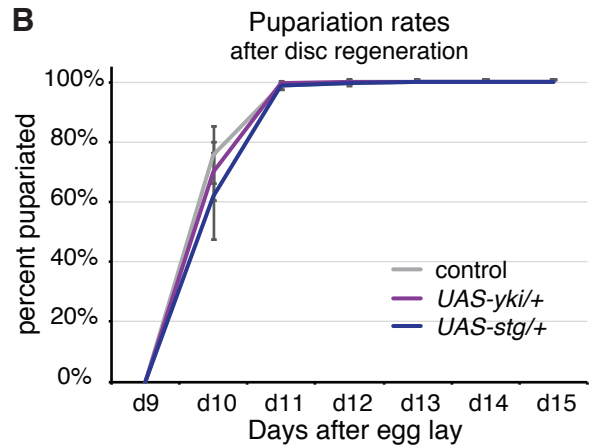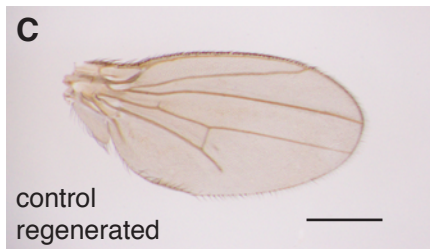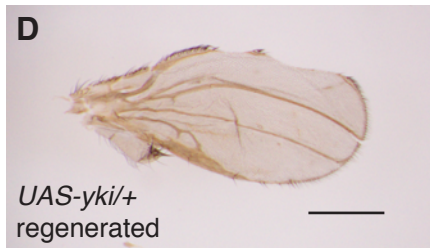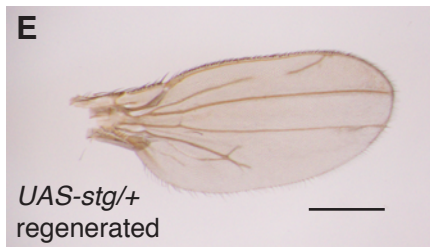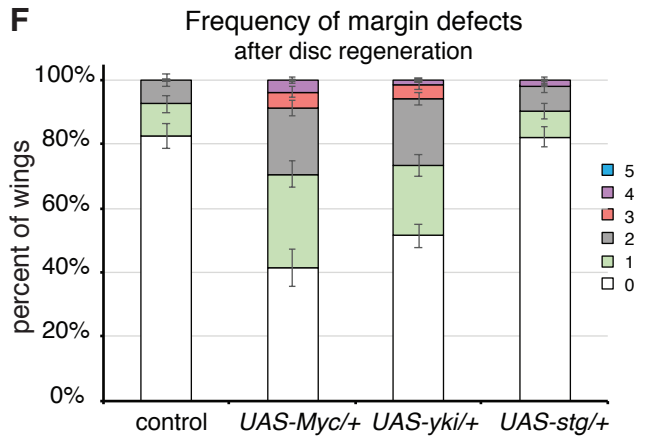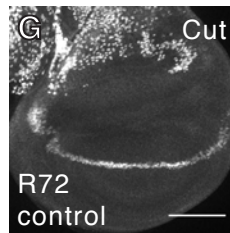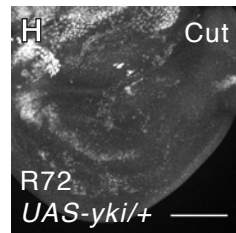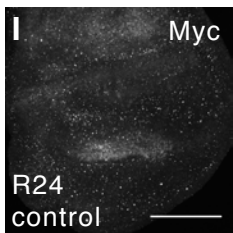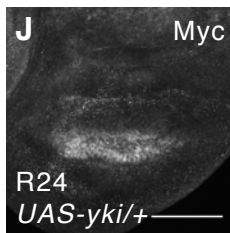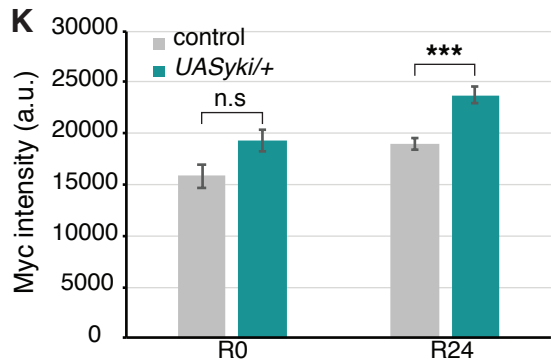

**Fig 6. Overexpression of multiple growth-promoting genes can cause patterning defects.**

(A) Adult wing sizes observed after disc regeneration for control ( $w^{1118}$ ) (n = 420), *UAS-yki/+* (n = 463) and *UAS-stg/+* (n = 347) wings, from three independent experiments. (B) Pupariation rates after disc regeneration for control ( $w^{1118}$ ) (n = 217), *UAS-yki/+* (n = 208) and *UAS-stg/+* (n = 210) wings, from three independent experiments. (C) Adult control ( $w^{1118}$ ) wing after disc regeneration. (D) Adult *UAS-yki/+* wing after disc regeneration. (E) Adult *UAS-stg/+* wing after disc regeneration. (F) Frequency of margin defects seen in adult wings after disc regeneration for control ( $w^{1118}$ ) (n = 209), *UAS-yki/+* (n = 357), and *UAS-stg/+* (n = 344) wings, from six independent experiments. (G-H) Anti-Ct immunostaining in an R72 control ( $w^{1118}$ ) disc (G) and an R72 *UAS-yki/+* disc (H). (I-J) Anti-Myc immunostaining in an R24 control ( $w^{1118}$ ) disc (I) and an R24 *UAS-yki/+* disc (J). (K) Quantification of Myc fluorescence intensity in R0 control ( $w^{1118}$ ) (n = 13), R0 *UAS-yki/+* (n = 12), R24 control ( $w^{1118}$ ) (n = 13), and R24 *UAS-yki/+* (n = 12) discs. Area for fluorescence intensity measurement was defined by the elevated Myc expression domain in the wing pouch. \*\*\* p < 0.00004. Error bars represent SEM. Student's T-test used for statistical analyses. Scale bars are 100  $\mu$ m.

**Fig 7**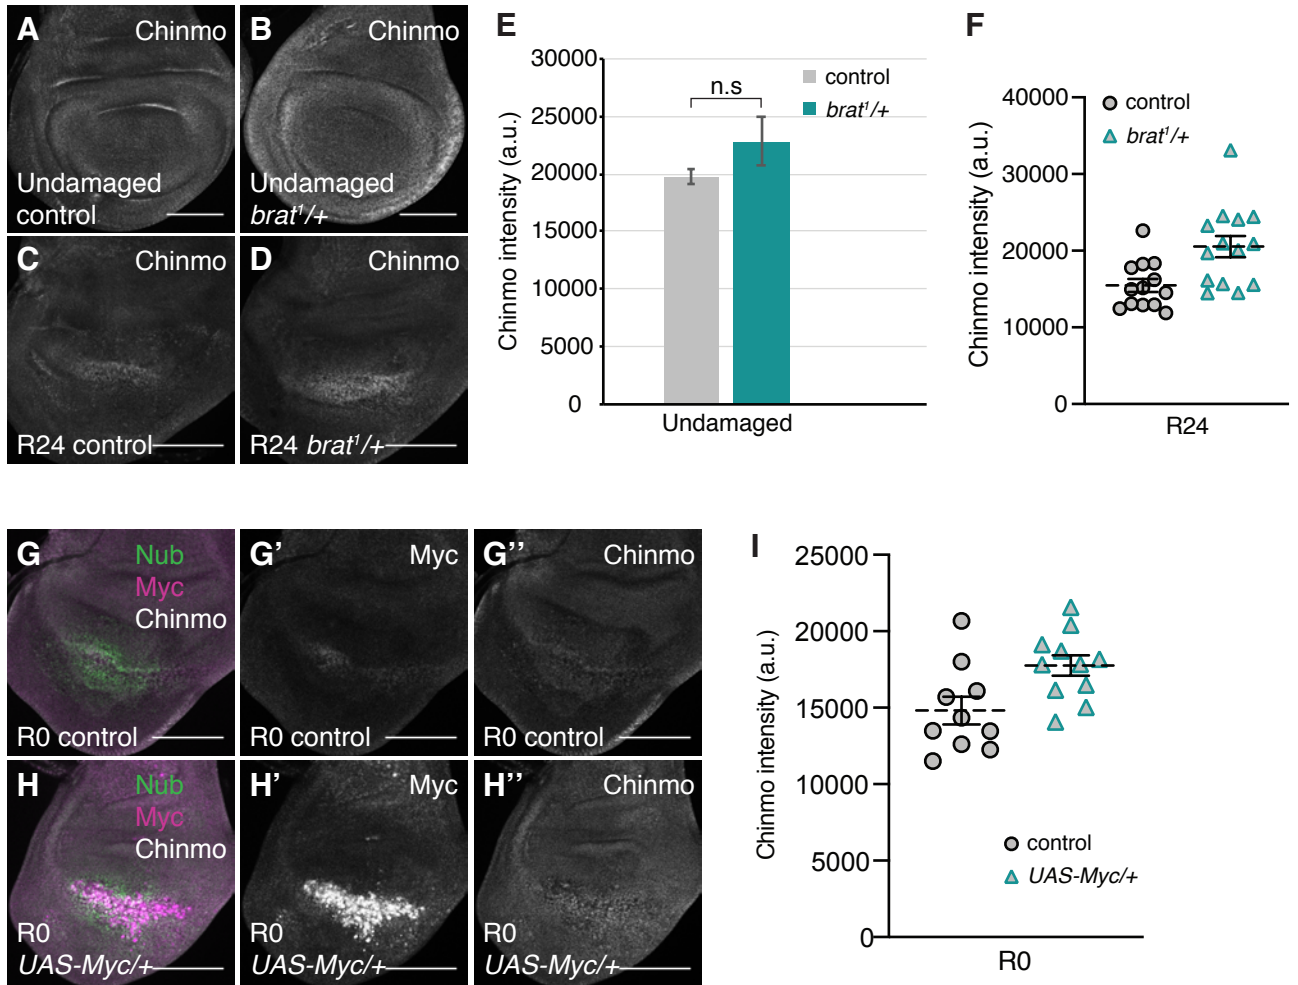

**Fig 7. Chinmo levels are elevated in *brat*<sup>1/+</sup> and Myc-overexpressing regenerating discs.**

(A-B) Anti-Chinmo immunostaining in an undamaged control (*w*<sup>1118</sup>) disc (A) and an undamaged *brat*<sup>1/+</sup> disc (B). (C-D) Anti-Chinmo immunostaining in an R24 control (*w*<sup>1118</sup>) disc (C) and an R24 *brat*<sup>1/+</sup> disc (D). (E) Quantification of Chinmo fluorescence intensity in undamaged control (*w*<sup>1118</sup>) (n = 11) and undamaged *brat*<sup>1/+</sup> (n = 10) discs. (F) Quantification of Chinmo fluorescence intensity in R24 control (*w*<sup>1118</sup>) (n = 13) and R24 *brat*<sup>1/+</sup> (n = 14) discs. p < 0.006. Area for fluorescence intensity measurement was defined by the elevated Chinmo expression domain in the wing pouch. (G) Merge of anti-Nubbin, anti-Myc and anti-Chinmo immunostaining in an R0 control (*w*<sup>1118</sup>) disc. (G'-G'') Same disc as (G) showing anti-Myc and anti-Chinmo immunostaining, respectively. (H) Merge of anti-Nubbin, anti-Myc and anti-Chinmo immunostaining in an R0 *brat*<sup>1/+</sup> disc. (H'-H'') Same disc as (H) showing anti-Myc and anti-Chinmo immunostaining, respectively. (I) Quantification of Chinmo fluorescence intensity in R0 control (*w*<sup>1118</sup>) (n = 10) and R0 *UAS-Myc/+* (n = 11) discs. p < 0.02. Area for fluorescence intensity measurement was defined by the elevated Myc expression domain in the wing pouch. Error bars represent SEM. Student's T-test used for statistical analyses. Scale bars are 100  $\mu$ m.



Fig 8

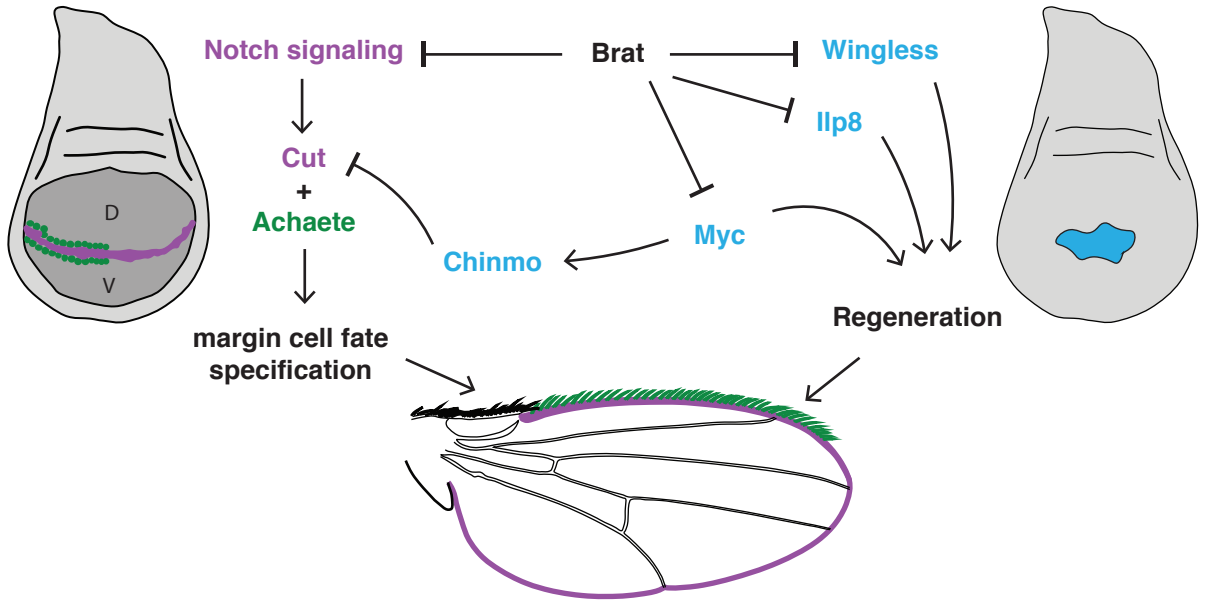

**Fig 8. Brat restricts pro-regeneration factors and ensures correct margin cell-fate specification.**

Model describing the network of Brat targets in the regenerating wing imaginal disc. Importantly, Brat restricts Myc levels, limiting expression of Myc's targets, including Chinmo, to allow correct margin cell-fate specification.
